# Supplementary material for: Prediction of Molecular Weight of Petroleum Fluids by Empirical Correlations and Artificial Neuron Networks
Source: MDPI journal article supplement (doi:10.3390/pr11020426), 2023-01-31
Supplement: s1 [file s1]

*Article*

# Prediction of molecular weight of petroleum fluids by empirical correlations and artificial neuron networks

**Dicho Stratiev <sup>1,2\*</sup>, Sotir Sotirov <sup>3</sup>, Evdokia Sotirova <sup>3</sup>, Svetoslav Nenov <sup>4</sup>, Rosen Dinkov <sup>1</sup>, Ivelina Shishkova<sup>1</sup>, Iliyan Venkov Kolev<sup>1,2</sup>, Dobromir Yordanov <sup>3</sup>, Svetlin Vasilev <sup>3</sup>, Krassimir Atanasov <sup>2,3</sup>, Stanislav Simeonov<sup>3</sup>, Georgi Nikolov Palichev<sup>2</sup>**

<sup>1</sup> LUKOIL Neftohim Burgas, 8104 Burgas, Bulgaria

<sup>2</sup> Institute of Biophysics and Biomedical Engineering, Bulgarian Academy of Sciences, Georgi Bonchev 105, 1113 Sofia, Bulgaria

<sup>3</sup> Intelligent Systems Laboratory, Department Industrial Technologies and Management, University Prof. Dr. Assen Zlatarov, Professor Yakimov 1, 8010 Burgas, Bulgaria

<sup>4</sup> Department of Mathematics, University of Chemical Technology and Metallurgy, Kliment Ohridski 8, 1756 Sofia, Bulgaria

**Table S1.** 430 data points for boiling point, specific gravity, and molecular weight of petroleum fluids, and individual hydrocarbons to be used for nonlinear regression modeling

| Nr | Petroleum fluid and individual component | Reference | SG    | TBP (K) | MW, g/mol |
|----|------------------------------------------|-----------|-------|---------|-----------|
| 1  | TOPS (C5/C6)                             | [9]       | 0,631 | 306     | 76        |
| 2  | naphtha                                  | [9]       | 0,714 | 372     | 99        |
| 3  | naphtha                                  | [9]       | 0,721 | 365     | 96        |
| 4  | naphtha                                  | [9]       | 0,729 | 373     | 100       |
| 5  | naphtha                                  | [9]       | 0,679 | 329     | 82        |
| 6  | naphtha                                  | [9]       | 0,709 | 356     | 92        |
| 7  | naphtha                                  | [9]       | 0,683 | 332     | 83        |
| 8  | naphtha                                  | [9]       | 0,726 | 373     | 99        |
| 9  | naphtha                                  | [9]       | 0,721 | 365     | 96        |
| 10 | naphtha                                  | [9]       | 0,683 | 332     | 83        |
| 11 | naphtha                                  | [9]       | 0,689 | 338     | 85        |
| 12 | naphtha                                  | [9]       | 0,691 | 346     | 88        |
| 13 | naphtha                                  | [9]       | 0,697 | 346     | 89        |
| 14 | naphtha                                  | [9]       | 0,742 | 385     | 105       |
| 15 | naphtha                                  | [9]       | 0,712 | 363     | 97        |
| 16 | kerosene                                 | [9]       | 0,820 | 492     | 161       |
| 17 | kerosene                                 | [9]       | 0,816 | 488     | 160       |
| 18 | light gas oil                            | [9]       | 0,832 | 550     | 204       |
| 19 | light gas oil                            | [9]       | 0,849 | 602     | 244       |
| 20 | light gas oil                            | [9]       | 0,833 | 539     | 192       |
| 21 | heavy gas oil                            | [9]       | 0,856 | 594     | 242       |
| 22 | heavy gas oil                            | [9]       | 0,857 | 575     | 221       |
| 23 | heavy gas oil                            | [9]       | 0,858 | 601     | 242       |
| 24 | heavy gas oil                            | [9]       | 0,862 | 632     | 277       |
| 25 | heavy gas oil                            | [9]       | 0,858 | 592     | 229       |
| 26 | heavy gas oil                            | [9]       | 0,865 | 589     | 231       |
| 27 | extra heavy gas oil                      | [9]       | 0,864 | 641     | 288       |
| 28 | extra heavy gas oil                      | [9]       | 0,866 | 644     | 291       |
| 29 | extra heavy gas oil                      | [9]       | 0,879 | 619     | 264       |
| 30 | extra heavy gas oil                      | [9]       | 0,877 | 635     | 277       |
| 31 | extra heavy gas oil                      | [9]       | 0,885 | 638     | 279       |
| 32 | hydrotreated VGO                         | [9]       | 0,870 | 669     | 326       |
| 33 | hydrocracked VGO                         | [9]       | 0,845 | 704     | 388       |
| 34 | short residue                            | [9]       | 0,971 | 890     | 720       |
| 35 | short residue                            | [9]       | 0,961 | 854     | 617       |
| 36 | short residue                            | [9]       | 1,017 | 898     | 726       |
| 37 | short residue                            | [9]       | 1,080 | 990     | 1106      |
| 38 | short residue                            | [9]       | 1,060 | 973     | 1020      |
| 39 | n-decane (C10H22)                        | [9]       | 0,734 | 447     | 142       |

|    |                                                            |      |       |      |      |
|----|------------------------------------------------------------|------|-------|------|------|
| 40 | n-eicosane (C <sub>20</sub> H <sub>42</sub> )              | [9]  | 0,792 | 617  | 282  |
| 41 | C <sub>30</sub> H <sub>62</sub>                            | [9]  | 0,813 | 723  | 423  |
| 42 | C <sub>40</sub> H <sub>82</sub>                            | [9]  | 0,824 | 798  | 563  |
| 43 | C <sub>60</sub> H <sub>122</sub>                           | [9]  | 0,835 | 894  | 844  |
| 44 | C <sub>100</sub> H <sub>202</sub>                          | [9]  | 0,844 | 988  | 1405 |
| 45 | C <sub>120</sub> H <sub>242</sub>                          | [9]  | 0,846 | 1012 | 1685 |
| 46 | cyclopentane                                               | [9]  | 0,751 | 322  | 70   |
| 47 | methylcyclohexane                                          | [9]  | 0,774 | 374  | 98   |
| 48 | n-dodecylcyclohexane                                       | [9]  | 0,826 | 601  | 253  |
| 49 | n-eicosylcyclohexane (C <sub>26</sub> H <sub>52</sub> )    | [9]  | 0,836 | 696  | 365  |
| 50 | 1-methyldecaline                                           | [9]  | 0,868 | 481  | 152  |
| 51 | toluene (C <sub>7</sub> H <sub>8</sub> )                   | [9]  | 0,872 | 384  | 92   |
| 52 | n-butylbenzene                                             | [9]  | 0,864 | 457  | 134  |
| 53 | C <sub>30</sub> -alkylbenzene                              | [9]  | 0,859 | 732  | 415  |
| 54 | C <sub>40</sub> -alkylbenzene                              | [9]  | 0,859 | 804  | 555  |
| 55 | C <sub>60</sub> -alkylbenzene                              | [9]  | 0,858 | 895  | 836  |
| 56 | C <sub>16</sub> H <sub>22</sub> -tetraline                 | [9]  | 0,993 | 598  | 214  |
| 57 | C <sub>12</sub> H <sub>16</sub> -alkylindan                | [9]  | 0,927 | 519  | 160  |
| 58 | diphenylethane                                             | [9]  | 0,989 | 554  | 182  |
| 59 | 2-methylnaphthalene                                        | [9]  | 1,010 | 514  | 142  |
| 60 | C <sub>4</sub> -naphthalene                                | [9]  | 0,981 | 579  | 198  |
| 61 | trihexylnaphthalene (C <sub>28</sub> H <sub>44</sub> )     | [9]  | 0,915 | 733  | 381  |
| 62 | 1-methyl-7-phenanthrene (C <sub>18</sub> H <sub>18</sub> ) | [9]  | 1,088 | 667  | 234  |
| 63 | octadecahydrochrysene (C <sub>18</sub> H <sub>30</sub> )   | [9]  | 0,985 | 626  | 246  |
| 64 | n-hexadecane (C <sub>16</sub> H <sub>34</sub> )            | [9]  | 0,777 | 560  | 226  |
| 65 | 1-hexadecene (C <sub>16</sub> H <sub>32</sub> )            | [9]  | 0,785 | 558  | 224  |
| 66 | visbroken naphtha                                          | [9]  | 0,705 | 367  | 95   |
| 67 | n-pentane                                                  | [9]  | 0,632 | 309  | 72   |
| 68 | benzene                                                    | [9]  | 0,884 | 353  | 78   |
| 69 | phenantrene                                                | [9]  | 1,176 | 612  | 178  |
| 70 | coronene                                                   | [9]  | 1,379 | 798  | 300  |
| 71 |                                                            | [27] | 0,658 | 328  | 78   |
| 72 |                                                            | [27] | 0,662 | 326  | 79   |
| 73 |                                                            | [27] | 0,657 | 328  | 80   |
| 74 |                                                            | [27] | 0,670 | 331  | 81   |
| 75 |                                                            | [27] | 0,672 | 336  | 82   |
| 76 |                                                            | [27] | 0,665 | 331  | 82   |
| 77 |                                                            | [27] | 0,675 | 335  | 83   |
| 78 |                                                            | [27] | 0,694 | 352  | 88   |
| 79 |                                                            | [27] | 0,703 | 364  | 92   |
| 80 |                                                            | [27] | 0,711 | 366  | 93   |
| 81 |                                                            | [27] | 0,696 | 365  | 93   |
| 82 |                                                            | [27] | 0,709 | 367  | 94   |

|     |  |      |       |     |     |
|-----|--|------|-------|-----|-----|
| 83  |  | [27] | 0,708 | 367 | 94  |
| 84  |  | [27] | 0,713 | 370 | 96  |
| 85  |  | [27] | 0,716 | 373 | 97  |
| 86  |  | [27] | 0,714 | 382 | 100 |
| 87  |  | [27] | 0,727 | 383 | 101 |
| 88  |  | [27] | 0,724 | 387 | 102 |
| 89  |  | [27] | 0,723 | 383 | 102 |
| 90  |  | [27] | 0,721 | 387 | 103 |
| 91  |  | [27] | 0,730 | 387 | 104 |
| 92  |  | [27] | 0,727 | 394 | 106 |
| 93  |  | [27] | 0,739 | 385 | 107 |
| 94  |  | [27] | 0,735 | 390 | 108 |
| 95  |  | [27] | 0,746 | 406 | 114 |
| 96  |  | [27] | 0,747 | 397 | 115 |
| 97  |  | [27] | 0,740 | 400 | 121 |
| 98  |  | [27] | 0,868 | 437 | 122 |
| 99  |  | [27] | 0,777 | 412 | 131 |
| 100 |  | [27] | 0,762 | 434 | 142 |
| 101 |  | [27] | 0,971 | 519 | 154 |
| 102 |  | [27] | 0,961 | 497 | 155 |
| 103 |  | [27] | 0,980 | 594 | 156 |
| 104 |  | [27] | 0,969 | 518 | 156 |
| 105 |  | [27] | 0,681 | 532 | 166 |
| 106 |  | [27] | 0,973 | 518 | 168 |
| 107 |  | [27] | 0,973 | 519 | 161 |
| 108 |  | [27] | 0,955 | 518 | 167 |
| 109 |  | [27] | 0,936 | 509 | 171 |
| 110 |  | [27] | 0,966 | 538 | 186 |
| 111 |  | [27] | 0,972 | 535 | 187 |
| 112 |  | [27] | 0,848 | 553 | 214 |
| 113 |  | [27] | 0,663 | 335 | 82  |
| 114 |  | [27] | 0,694 | 363 | 92  |
| 115 |  | [27] | 0,700 | 370 | 95  |
| 116 |  | [27] | 0,706 | 377 | 97  |
| 117 |  | [27] | 0,711 | 382 | 100 |
| 118 |  | [27] | 0,728 | 373 | 101 |
| 119 |  | [27] | 0,720 | 374 | 101 |
| 120 |  | [27] | 0,721 | 377 | 102 |
| 121 |  | [27] | 0,726 | 380 | 104 |
| 122 |  | [27] | 0,744 | 385 | 106 |
| 123 |  | [27] | 0,738 | 386 | 107 |
| 124 |  | [27] | 0,742 | 388 | 107 |
| 125 |  | [27] | 0,737 | 389 | 109 |

|     |                      |      |       |     |     |
|-----|----------------------|------|-------|-----|-----|
| 126 |                      | [27] | 0,748 | 389 | 109 |
| 127 |                      | [27] | 0,736 | 390 | 110 |
| 128 |                      | [27] | 0,753 | 400 | 114 |
| 129 |                      | [27] | 0,755 | 400 | 114 |
| 130 |                      | [27] | 0,747 | 403 | 116 |
| 131 |                      | [27] | 0,743 | 401 | 115 |
| 132 |                      | [27] | 0,750 | 406 | 117 |
| 133 |                      | [27] | 0,756 | 407 | 118 |
| 134 |                      | [27] | 0,756 | 420 | 126 |
| 135 |                      | [27] | 0,767 | 426 | 126 |
| 136 |                      | [27] | 0,772 | 420 | 127 |
| 137 |                      | [27] | 0,773 | 421 | 127 |
| 138 |                      | [27] | 0,768 | 420 | 127 |
| 139 |                      | [27] | 0,774 | 425 | 129 |
| 140 |                      | [27] | 0,777 | 426 | 130 |
| 141 |                      | [27] | 0,767 | 429 | 130 |
| 142 |                      | [27] | 0,771 | 426 | 130 |
| 143 |                      | [27] | 0,769 | 432 | 133 |
| 144 |                      | [27] | 0,776 | 431 | 133 |
| 145 |                      | [27] | 0,779 | 432 | 133 |
| 146 |                      | [27] | 0,780 | 438 | 137 |
| 147 |                      | [27] | 0,790 | 469 | 153 |
| 148 |                      | [27] | 0,789 | 463 | 154 |
| 149 |                      | [27] | 0,796 | 469 | 157 |
| 150 |                      | [27] | 0,797 | 473 | 160 |
| 151 |                      | [27] | 0,803 | 469 | 161 |
| 152 |                      | [27] | 0,800 | 480 | 165 |
| 153 |                      | [27] | 0,806 | 480 | 166 |
| 154 |                      | [27] | 0,803 | 487 | 170 |
| 155 | jet naphtha          | [28] | 0,805 | 434 | 144 |
| 156 | low-boiling naphtha  | [28] | 0,740 | 400 | 120 |
| 157 | high-boiling naphtha | [28] | 0,762 | 434 | 142 |
| 158 | kerosine             | [28] | 0,808 | 480 | 162 |
| 159 | fuel oil             | [28] | 0,862 | 559 | 228 |
| 160 | gas oil              | [28] | 0,848 | 553 | 214 |
| 161 |                      | [29] | 0,947 | 494 | 144 |
| 162 |                      | [29] | 0,950 | 514 | 161 |
| 163 |                      | [29] | 0,955 | 541 | 176 |
| 164 |                      | [29] | 0,982 | 567 | 196 |
| 165 |                      | [29] | 0,990 | 598 | 213 |
| 166 |                      | [29] | 1,022 | 623 | 234 |
| 167 |                      | [29] | 1,069 | 647 | 250 |
| 168 |                      | [29] | 1,046 | 667 | 262 |

|     |  |      |       |      |      |
|-----|--|------|-------|------|------|
| 169 |  | [29] | 0,963 | 547  | 191  |
| 170 |  | [29] | 0,972 | 575  | 208  |
| 171 |  | [29] | 0,985 | 600  | 220  |
| 172 |  | [29] | 0,999 | 626  | 240  |
| 173 |  | [29] | 1,026 | 664  | 267  |
| 174 |  | [29] | 1,047 | 699  | 304  |
| 175 |  | [29] | 1,066 | 723  | 343  |
| 176 |  | [29] | 1,082 | 738  | 334  |
| 177 |  | [29] | 0,907 | 518  | 175  |
| 178 |  | [29] | 0,924 | 544  | 194  |
| 179 |  | [29] | 0,940 | 570  | 211  |
| 180 |  | [29] | 0,953 | 596  | 234  |
| 181 |  | [29] | 0,968 | 619  | 254  |
| 182 |  | [29] | 0,979 | 651  | 279  |
| 183 |  | [29] | 0,972 | 571  | 202  |
| 184 |  | [29] | 0,978 | 595  | 224  |
| 185 |  | [29] | 0,987 | 622  | 244  |
| 186 |  | [29] | 1,015 | 647  | 257  |
| 187 |  | [29] | 1,025 | 666  | 263  |
| 188 |  | [29] | 1,044 | 693  | 312  |
| 189 |  | [23] | 1,032 | 742  | 342  |
| 190 |  | [23] | 1,008 | 750  | 373  |
| 191 |  | [23] | 1,022 | 765  | 398  |
| 192 |  | [23] | 1,022 | 783  | 471  |
| 193 |  | [23] | 1,022 | 808  | 490  |
| 194 |  | [23] | 0,907 | 742  | 355  |
| 195 |  | [23] | 0,906 | 750  | 390  |
| 196 |  | [23] | 0,916 | 765  | 420  |
| 197 |  | [23] | 0,920 | 783  | 451  |
| 198 |  | [23] | 0,921 | 808  | 473  |
| 199 |  | [23] | 0,923 | 942  | 785  |
| 200 |  | [23] | 0,918 | 950  | 933  |
| 201 |  | [23] | 0,920 | 965  | 1066 |
| 202 |  | [23] | 0,916 | 983  | 1114 |
| 203 |  | [23] | 0,919 | 1008 | 1286 |
| 204 |  | [23] | 1,013 | 888  | 721  |
| 205 |  | [23] | 1,013 | 893  | 726  |
| 206 |  | [23] | 1,013 | 890  | 723  |
| 207 |  | [23] | 1,013 | 895  | 728  |
| 208 |  | [23] | 0,925 | 892  | 723  |
| 209 |  | [23] | 0,924 | 886  | 720  |
| 210 |  | [23] | 0,925 | 900  | 714  |
| 211 |  | [30] | 0,903 | 698  | 346  |

|     |                     |      |       |     |     |
|-----|---------------------|------|-------|-----|-----|
| 212 |                     | [30] | 0,919 | 731 | 382 |
| 213 |                     | [30] | 0,896 | 724 | 385 |
| 214 |                     | [30] | 0,932 | 744 | 415 |
| 215 |                     | [30] | 0,905 | 739 | 423 |
| 216 |                     | [30] | 0,913 | 718 | 366 |
| 217 |                     | [30] | 0,922 | 711 | 358 |
| 218 |                     | [30] | 0,897 | 631 | 283 |
| 219 |                     | [30] | 0,871 | 744 | 438 |
| 220 |                     | [30] | 1,003 | 738 | 382 |
| 221 |                     | [31] | 0,655 | 342 | 86  |
| 222 | n-Hexane            | [31] | 0,684 | 372 | 100 |
| 223 | n-Heptane           | [31] | 0,718 | 424 | 128 |
| 224 | n-Nonane            | [31] | 0,749 | 489 | 170 |
| 225 | n-Dodecane          | [31] | 0,756 | 507 | 184 |
| 226 | n-Tridecane         | [31] | 0,763 | 527 | 198 |
| 227 | n-Tetradecane       | [31] | 0,776 | 543 | 210 |
| 228 | n-Pentadecane       | [31] | 0,773 | 560 | 226 |
| 229 | n-Hexadecane        | [31] | 0,785 | 575 | 238 |
| 230 | n-Heptadecane       | [31] | 0,777 | 590 | 255 |
| 231 | n-Octadecane        | [31] | 0,786 | 603 | 269 |
| 232 | n-Nonadecane        | [31] | 0,867 | 409 | 106 |
| 233 | Ethylbenzene        | [31] | 0,862 | 432 | 120 |
| 234 | Propylbenzene       | [31] | 0,860 | 456 | 134 |
| 235 | Butylbenzene        | [31] | 0,864 | 412 | 106 |
| 236 | m-Xylene            | [31] | 0,857 | 513 | 176 |
| 237 | Heptylbenzene       | [31] | 1,025 | 491 | 128 |
| 238 | Naphthalene         | [31] | 1,020 | 518 | 142 |
| 239 | 1-Methylnaphthalene | [31] | 0,937 | 639 | 254 |
| 240 | Nonylnaphthalene    | [32] | 0,640 | 303 | 70  |
| 241 | pentene             | [32] | 0,674 | 337 | 84  |
| 242 | hexene              | [32] | 0,697 | 367 | 98  |
| 243 | heptene             | [32] | 0,714 | 394 | 112 |
| 244 | octene              | [32] | 0,982 | 388 | 79  |
| 245 | pyridine            | [32] | 1,020 | 457 | 93  |
| 246 | aniline             | [32] | 1,170 | 527 | 117 |
| 247 | indole              | [32] | 1,090 | 510 | 129 |
| 248 | quinoline           | [32] | 0,854 | 658 | 302 |
| 249 | hexadecylbenzene    | [32] | 0,854 | 646 | 289 |
| 250 | pentadecylbenzene   | [32] | 0,855 | 632 | 275 |
| 251 | tetradecylbenzene   | [32] | 0,815 | 404 | 144 |
| 252 | Pyrolysis naphtha   | [33] | 0,894 | 535 | 224 |
| 253 | AGO                 | [33] | 0,970 | 702 | 386 |
| 254 | VGO                 | [33] | 0,925 | 826 | 618 |

|     |                  |      |       |     |     |
|-----|------------------|------|-------|-----|-----|
| 255 | HVGO             | [33] | 0,860 | 736 | 378 |
| 256 |                  | [34] | 0,868 | 748 | 405 |
| 257 |                  | [34] | 0,925 | 736 | 414 |
| 258 |                  | [34] | 0,877 | 698 | 367 |
| 259 |                  | [34] | 0,898 | 728 | 407 |
| 260 |                  | [34] | 0,801 | 700 | 426 |
| 261 | Daqing VGO       | [35] | 0,863 | 655 | 283 |
| 262 | Daqing CGO       | [35] | 0,910 | 666 | 308 |
| 263 | Daguang CGO      | [35] | 0,930 | 735 | 494 |
| 264 | Aramco           | [36] | 0,903 | 736 | 432 |
| 265 | Montmirail       | [36] | 0,941 | 718 | 368 |
| 266 | Nigeria          | [36] | 0,953 | 693 | 306 |
| 267 | CGO-4            | [37] | 1,059 | 733 | 348 |
| 268 | FCCS-6           | [37] | 0,982 | 656 | 335 |
| 269 | Kern River AR    | [38] | 0,991 | 714 | 420 |
| 270 | Kern River AR    | [38] | 1,004 | 748 | 470 |
| 271 | Kern River AR    | [38] | 1,007 | 786 | 525 |
| 272 | Kern River AR    | [38] | 1,014 | 824 | 595 |
| 273 | Kern River AR    | [38] | 1,021 | 861 | 680 |
| 274 | Kern River AR    | [38] | 1,024 | 899 | 755 |
| 275 | Kern River AR    | [38] | 1,024 | 944 | 875 |
| 276 | Kern River AR    | [38] | 0,969 | 643 | 330 |
| 277 | Arabian Heavy AR | [38] | 0,979 | 702 | 400 |
| 278 | Arabian Heavy AR | [38] | 0,979 | 748 | 470 |
| 279 | Arabian Heavy AR | [38] | 0,979 | 786 | 550 |
| 280 | Arabian Heavy AR | [38] | 0,988 | 825 | 610 |
| 281 | Arabian Heavy AR | [38] | 1,004 | 866 | 705 |
| 282 | Arabian Heavy AR | [38] | 1,011 | 896 | 785 |
| 283 | Arabian Heavy AR | [38] | 1,014 | 946 | 955 |
| 284 | Arabian Heavy AR | [38] | 0,954 | 623 | 305 |
| 285 | Arabian Heavy AR | [38] | 0,960 | 698 | 410 |
| 286 | Maya AR          | [38] | 0,985 | 749 | 480 |
| 287 | Maya AR          | [38] | 0,991 | 795 | 550 |
| 288 | Maya AR          | [38] | 0,998 | 824 | 620 |
| 289 | Maya AR          | [38] | 1,004 | 862 | 675 |
| 290 | Maya AR          | [38] | 1,011 | 890 | 760 |
| 291 | Maya AR          | [38] | 1,014 | 925 | 825 |
| 292 | Maya AR          | [38] | 1,014 | 981 | 935 |
| 293 | Maya AR          | [38] | 0,988 | 647 | 315 |
| 294 | Maya AR          | [38] | 0,988 | 707 | 385 |
| 295 | Boscan AR        | [38] | 0,988 | 748 | 450 |
| 296 | Boscan AR        | [38] | 0,998 | 789 | 515 |
| 297 | Boscan AR        | [38] | 0,994 | 825 | 590 |



|     |           |      |       |     |     |
|-----|-----------|------|-------|-----|-----|
| 298 | Boscan AR | [38] | 1,014 | 836 | 600 |
| 299 | Boscan AR | [38] | 1,017 | 876 | 690 |
| 300 |           | [38] | 1,024 | 934 | 840 |
| 301 |           | [38] | 1,038 | 968 | 925 |
| 302 |           | [38] | 0,931 | 655 | 335 |
| 303 |           | [38] | 0,954 | 709 | 430 |
| 304 |           | [38] | 0,972 | 787 | 540 |
| 305 |           | [38] | 0,991 | 860 | 675 |
| 306 |           | [38] | 1,011 | 920 | 875 |
| 307 |           | [39] | 0,913 | 656 | 313 |
| 308 |           | [39] | 0,927 | 696 | 348 |
| 309 |           | [39] | 0,930 | 726 | 380 |
| 310 |           | [39] | 0,938 | 746 | 410 |
| 311 |           | [40] | 0,795 | 509 | 197 |
| 312 |           | [40] | 0,785 | 465 | 149 |
| 313 |           | [39] | 0,865 | 561 | 206 |
| 314 |           | [41] | 0,921 | 695 | 402 |
| 315 |           | [41] | 0,877 | 635 | 276 |
| 316 |           | [41] | 0,899 | 569 | 228 |
| 317 |           | [41] | 0,906 | 690 | 354 |
| 318 |           | [41] | 0,905 | 626 | 272 |
| 319 |           | [41] | 0,884 | 616 | 271 |
| 320 |           | [41] | 0,884 | 643 | 250 |
| 321 |           | [41] | 0,904 | 634 | 281 |
| 322 |           | [41] | 0,905 | 639 | 320 |
| 323 |           | [41] | 0,945 | 634 | 332 |
| 324 |           | [41] | 0,906 | 642 | 295 |
| 325 |           | [41] | 0,957 | 621 | 278 |
| 326 |           | [41] | 0,909 | 651 | 325 |
| 327 |           | [41] | 0,964 | 704 | 366 |
| 328 |           | [41] | 0,892 | 638 | 298 |
| 329 |           | [22] | 0,686 | 337 | 84  |
| 330 |           | [22] | 0,723 | 365 | 96  |
| 331 |           | [22] | 0,746 | 390 | 107 |
| 332 |           | [22] | 0,765 | 415 | 121 |
| 333 |           | [22] | 0,779 | 439 | 134 |
| 334 |           | [22] | 0,790 | 460 | 147 |
| 335 |           | [22] | 0,801 | 481 | 161 |
| 336 |           | [22] | 0,812 | 500 | 175 |
| 337 |           | [22] | 0,823 | 520 | 180 |
| 338 |           | [22] | 0,833 | 539 | 206 |
| 339 |           | [22] | 0,840 | 556 | 222 |
| 340 |           | [22] | 0,848 | 573 | 237 |

|     |                         |      |       |     |     |
|-----|-------------------------|------|-------|-----|-----|
| 341 |                         | [22] | 0,853 | 586 | 251 |
| 342 |                         | [22] | 0,858 | 598 | 263 |
| 343 |                         | [22] | 0,883 | 611 | 275 |
| 344 |                         | [22] | 0,868 | 624 | 291 |
| 345 |                         | [22] | 0,873 | 636 | 305 |
| 346 |                         | [22] | 0,878 | 648 | 318 |
| 347 |                         | [22] | 0,882 | 659 | 331 |
| 348 |                         | [22] | 0,886 | 670 | 345 |
| 349 |                         | [22] | 0,890 | 681 | 359 |
| 350 |                         | [22] | 0,894 | 691 | 374 |
| 351 |                         | [22] | 0,897 | 701 | 388 |
| 352 |                         | [22] | 0,900 | 709 | 402 |
| 353 |                         | [22] | 0,903 | 719 | 416 |
| 354 |                         | [22] | 0,907 | 728 | 430 |
| 355 |                         | [22] | 0,910 | 736 | 444 |
| 356 |                         | [22] | 0,913 | 745 | 458 |
| 357 |                         | [22] | 0,915 | 753 | 472 |
| 358 |                         | [22] | 0,918 | 760 | 486 |
| 359 |                         | [22] | 0,920 | 768 | 500 |
| 360 |                         | [22] | 0,923 | 773 | 514 |
| 361 |                         | [22] | 0,925 | 781 | 528 |
| 362 |                         | [22] | 0,929 | 788 | 542 |
| 363 |                         | [22] | 0,929 | 795 | 558 |
| 364 |                         | [22] | 0,931 | 801 | 570 |
| 365 |                         | [22] | 0,932 | 807 | 584 |
| 366 |                         | [22] | 0,934 | 813 | 598 |
| 367 |                         | [22] | 0,936 | 820 | 612 |
| 368 |                         | [22] | 0,938 | 826 | 626 |
| 369 |                         | [42] | 1,527 | 811 | 403 |
| 370 |                         | [42] | 1,483 | 826 | 417 |
| 371 |                         | [42] | 1,451 | 828 | 431 |
| 372 |                         | [42] | 1,420 | 844 | 445 |
| 373 |                         | [42] | 1,285 | 865 | 543 |
| 374 |                         | [42] | 1,173 | 911 | 683 |
| 375 |                         | [42] | 0,911 | 811 | 501 |
| 376 |                         | [42] | 0,941 | 824 | 550 |
| 377 |                         | [42] | 0,875 | 744 | 387 |
| 378 |                         | [42] | 1,049 | 747 | 400 |
| 379 | Dist. Data of CO-B-A1_0 | [1]  | 0,902 | 582 | 236 |
| 380 | Dist. Data of CO-B-A1_1 | [1]  | 0,925 | 594 | 258 |
| 381 | Dist. Data of CO-B-A1_2 | [1]  | 0,946 | 619 | 301 |
| 382 | Dist. Data of CO-B-A1_3 | [1]  | 0,961 | 643 | 329 |
| 383 | Dist. Data of CO-B-A1_4 | [1]  | 0,970 | 668 | 380 |

|     |                          |     |       |     |     |
|-----|--------------------------|-----|-------|-----|-----|
| 384 | Dist. Data of CO-B-A1_5  | [1] | 0,981 | 703 | 398 |
| 385 | Dist. Data of CO-B-A1_6  | [1] | 0,993 | 727 | 475 |
| 386 | Dist. Data of CO-B-A1_7  | [1] | 0,998 | 762 | 516 |
| 387 | Dist. Data of MX-HO-A1_0 | [1] | 0,863 | 582 | 207 |
| 388 | Dist. Data of MX-HO-A1_1 | [1] | 0,903 | 594 | 265 |
| 389 | Dist. Data of MX-HO-A1_2 | [1] | 0,921 | 619 | 285 |
| 390 | Dist. Data of MX-HO-A1_3 | [1] | 0,933 | 643 | 325 |
| 391 | Dist. Data of MX-HO-A1_4 | [1] | 0,944 | 668 | 346 |
| 392 | Dist. Data of MX-HO-A1_5 | [1] | 0,955 | 703 | 408 |
| 393 | Dist. Data of MX-HO-A1_6 | [1] | 0,968 | 727 | 436 |
| 394 | Dist. Data of MX-HO-A1_7 | [1] | 0,971 | 762 | 468 |
| 395 | Dist. Data of CO-B-B1_0  | [1] | 0,916 | 582 | 234 |
| 396 | Dist. Data of CO-B-B1_1  | [1] | 0,900 | 594 | 281 |
| 397 | Dist. Data of CO-B-B1_2  | [1] | 0,902 | 619 | 306 |
| 398 | Dist. Data of CO-B-B1_3  | [1] | 0,900 | 643 | 350 |
| 399 | Dist. Data of CO-B-B1_4  | [1] | 0,895 | 668 | 388 |
| 400 | Dist. Data of CO-B-B1_5  | [1] | 0,879 | 703 | 432 |
| 401 | Dist. Data of CO-B-B1_6  | [1] | 0,867 | 727 | 447 |
| 402 | Dist. Data of CO-B-B1_7  | [1] | 0,984 | 762 | 476 |
| 403 | Dist. Data of US-OH-A1_0 | [1] | 0,871 | 582 | 227 |
| 404 | Dist. Data of US-OH-A1_1 | [1] | 0,903 | 594 | 261 |
| 405 | Dist. Data of US-OH-A1_2 | [1] | 0,920 | 619 | 295 |
| 406 | Dist. Data of US-OH-A1_3 | [1] | 0,928 | 643 | 337 |
| 407 | Dist. Data of US-OH-A1_4 | [1] | 0,938 | 668 | 372 |
| 408 | Dist. Data of US-OH-A1_5 | [1] | 0,950 | 703 | 411 |
| 409 | Dist. Data of US-OH-A1_6 | [1] | 0,960 | 727 | 485 |
| 410 | Dist. Data of US-OH-A1_7 | [1] | 0,963 | 762 | 493 |
| 411 | Dist. Data of WC-B-D1_0  | [1] | 0,951 | 582 | 225 |
| 412 | Dist. Data of WC-B-D1_1  | [1] | 0,972 | 594 | 259 |
| 413 | Dist. Data of WC-B-D1_2  | [1] | 0,986 | 619 | 287 |
| 414 | Dist. Data of WC-B-D1_3  | [1] | 0,959 | 643 | 323 |
| 415 | Dist. Data of WC-B-D1_4  | [1] | 0,986 | 668 | 372 |
| 416 | Dist. Data of WC-B-D1_5  | [1] | 1,008 | 703 | 451 |
| 417 | Dist. Data of WC-B-D1_6  | [1] | 0,951 | 727 | 463 |
| 418 | Dist. Data of WC-B-D1_7  | [1] | 0,977 | 762 | 546 |
| 419 | Dist. Data of RO-HO-A1_0 | [1] | 0,997 | 582 | 232 |
| 420 | Dist. Data of RO-HO-A1_1 | [1] | 1,177 | 594 | 259 |
| 421 | Dist. Data of RO-HO-A1_2 | [1] | 1,101 | 619 | 289 |
| 422 | Dist. Data of RO-HO-A1_3 | [1] | 0,905 | 643 | 340 |
| 423 | Dist. Data of RO-HO-A1_4 | [1] | 0,912 | 668 | 378 |
| 424 | Dist. Data of RO-HO-A1_5 | [1] | 0,922 | 703 | 399 |
| 425 | Dist. Data of RO-HO-A1_6 | [1] | 0,971 | 727 | 442 |
| 426 | Dist. Data of RO-HO-A1_7 | [1] | 0,986 | 762 | 499 |

|     |          |     |       |     |     |
|-----|----------|-----|-------|-----|-----|
| 427 | WC-B-B1  | [2] | 1,002 | 810 | 559 |
| 428 | WC-B-D1  | [2] | 0,997 | 800 | 585 |
| 429 | CO-B-A1  | [2] | 1,006 | 860 | 604 |
| 430 | MX-HO-A1 | [2] | 0,978 | 840 | 653 |

**Table S2.** 430 data points for boiling point, specific gravity, Kw-factor, and TBP distillation characteristics and logarithm of molecular weight of petroleum fluids, and individual hydrocarbons to be used for ANN modeling.

|    | ANN inlet |       |     |     |     |     |     |      |       | ANN outlet<br>LN(MW) |
|----|-----------|-------|-----|-----|-----|-----|-----|------|-------|----------------------|
| Nr | SG        | Tb, K | T5  | T10 | T30 | T50 | T70 | T90  | Kw    |                      |
| 1  | 0,631     | 306   | 211 | 236 | 285 | 301 | 314 | 345  | 12,99 | 4,33                 |
| 2  | 0,714     | 372   | 306 | 318 | 351 | 370 | 386 | 408  | 12,26 | 4,60                 |
| 3  | 0,721     | 365   | 302 | 312 | 344 | 362 | 378 | 400  | 12,07 | 4,56                 |
| 4  | 0,729     | 373   | 311 | 322 | 352 | 371 | 387 | 408  | 12,01 | 4,61                 |
| 5  | 0,679     | 329   | 256 | 269 | 308 | 325 | 339 | 364  | 12,37 | 4,41                 |
| 6  | 0,709     | 356   | 291 | 302 | 335 | 353 | 368 | 391  | 12,16 | 4,52                 |
| 7  | 0,683     | 332   | 261 | 273 | 311 | 328 | 342 | 367  | 12,34 | 4,42                 |
| 8  | 0,726     | 373   | 311 | 321 | 352 | 371 | 387 | 408  | 12,05 | 4,60                 |
| 9  | 0,721     | 365   | 302 | 312 | 344 | 362 | 378 | 400  | 12,07 | 4,56                 |
| 10 | 0,683     | 332   | 261 | 273 | 311 | 328 | 342 | 367  | 12,34 | 4,42                 |
| 11 | 0,689     | 338   | 268 | 280 | 317 | 334 | 349 | 373  | 12,31 | 4,44                 |
| 12 | 0,691     | 346   | 276 | 288 | 325 | 343 | 357 | 382  | 12,35 | 4,48                 |
| 13 | 0,697     | 346   | 278 | 290 | 325 | 343 | 357 | 381  | 12,26 | 4,49                 |
| 14 | 0,742     | 385   | 325 | 335 | 364 | 383 | 400 | 420  | 11,93 | 4,65                 |
| 15 | 0,712     | 363   | 298 | 309 | 342 | 360 | 376 | 398  | 12,19 | 4,57                 |
| 16 | 0,820     | 492   | 427 | 446 | 471 | 494 | 517 | 537  | 11,71 | 5,08                 |
| 17 | 0,816     | 488   | 424 | 443 | 467 | 490 | 513 | 533  | 11,74 | 5,08                 |
| 18 | 0,832     | 550   | 479 | 504 | 530 | 554 | 580 | 602  | 11,97 | 5,32                 |
| 19 | 0,849     | 602   | 522 | 554 | 582 | 608 | 637 | 661  | 12,10 | 5,50                 |
| 20 | 0,833     | 539   | 468 | 493 | 519 | 543 | 568 | 590  | 11,88 | 5,26                 |
| 21 | 0,856     | 594   | 511 | 544 | 574 | 600 | 629 | 654  | 11,94 | 5,49                 |
| 22 | 0,857     | 575   | 493 | 524 | 555 | 580 | 608 | 633  | 11,80 | 5,40                 |
| 23 | 0,858     | 601   | 517 | 551 | 581 | 607 | 636 | 662  | 11,97 | 5,49                 |
| 24 | 0,862     | 632   | 544 | 581 | 612 | 639 | 670 | 697  | 12,10 | 5,62                 |
| 25 | 0,858     | 592   | 509 | 541 | 572 | 598 | 626 | 652  | 11,91 | 5,43                 |
| 26 | 0,865     | 589   | 502 | 536 | 569 | 595 | 623 | 650  | 11,79 | 5,44                 |
| 27 | 0,864     | 641   | 551 | 589 | 621 | 649 | 680 | 707  | 12,14 | 5,66                 |
| 28 | 0,866     | 644   | 552 | 592 | 624 | 652 | 683 | 711  | 12,13 | 5,67                 |
| 29 | 0,879     | 619   | 520 | 561 | 599 | 626 | 656 | 686  | 11,79 | 5,58                 |
| 30 | 0,877     | 635   | 537 | 578 | 615 | 642 | 673 | 703  | 11,93 | 5,62                 |
| 31 | 0,885     | 638   | 533 | 577 | 618 | 646 | 677 | 709  | 11,84 | 5,63                 |
| 32 | 0,870     | 669   | 574 | 616 | 649 | 678 | 711 | 739  | 12,23 | 5,79                 |
| 33 | 0,845     | 704   | 622 | 661 | 684 | 714 | 749 | 772  | 12,81 | 5,96                 |
| 34 | 0,971     | 890   | 510 | 738 | 870 | 907 | 952 | 1045 | 12,05 | 6,58                 |
| 35 | 0,961     | 854   | 548 | 720 | 834 | 870 | 913 | 993  | 12,02 | 6,42                 |
| 36 | 1,017     | 898   | 587 | 661 | 878 | 915 | 961 | 1111 | 11,54 | 6,59                 |

|    |       |      |      |     |     |      |      |      |       |      |
|----|-------|------|------|-----|-----|------|------|------|-------|------|
| 37 | 1,080 | 990  | 1146 | 563 | 971 | 1011 | 1062 | 1358 | 11,22 | 7,01 |
| 38 | 1,060 | 973  | 984  | 612 | 954 | 993  | 1043 | 1285 | 11,37 | 6,93 |
| 39 | 0,734 | 447  | 378  | 396 | 426 | 447  | 468  | 490  | 12,66 | 4,96 |
| 40 | 0,792 | 617  | 548  | 577 | 597 | 624  | 654  | 673  | 13,07 | 5,64 |
| 41 | 0,813 | 723  | 650  | 687 | 703 | 734  | 770  | 789  | 13,42 | 6,05 |
| 42 | 0,824 | 798  | 722  | 765 | 778 | 811  | 852  | 871  | 13,69 | 6,33 |
| 43 | 0,835 | 894  | 815  | 865 | 874 | 911  | 957  | 977  | 14,04 | 6,74 |
| 44 | 0,844 | 988  | 905  | 962 | 969 | 1008 | 1059 | 1080 | 14,36 | 7,25 |
| 45 | 0,846 | 1012 | 928  | 987 | 993 | 1033 | 1086 | 1106 | 14,44 | 7,43 |
| 46 | 0,751 | 322  | 272  | 274 | 301 | 318  | 331  | 349  | 11,10 | 4,25 |
| 47 | 0,774 | 374  | 320  | 327 | 353 | 372  | 388  | 406  | 11,32 | 4,58 |
| 48 | 0,826 | 601  | 529  | 558 | 581 | 607  | 636  | 657  | 12,43 | 5,53 |
| 49 | 0,836 | 696  | 618  | 655 | 676 | 706  | 740  | 762  | 12,90 | 5,90 |
| 50 | 0,868 | 481  | 401  | 426 | 460 | 483  | 505  | 530  | 10,98 | 5,02 |
| 51 | 0,872 | 384  | 315  | 329 | 363 | 382  | 399  | 422  | 10,14 | 4,52 |
| 52 | 0,864 | 457  | 382  | 403 | 436 | 458  | 479  | 503  | 10,84 | 4,90 |
| 53 | 0,859 | 732  | 641  | 685 | 712 | 743  | 779  | 806  | 12,76 | 6,03 |
| 54 | 0,859 | 804  | 711  | 760 | 784 | 818  | 858  | 884  | 13,17 | 6,32 |
| 55 | 0,858 | 895  | 802  | 856 | 875 | 912  | 958  | 983  | 13,66 | 6,73 |
| 56 | 0,993 | 598  | 213  | 451 | 578 | 604  | 633  | 718  | 10,32 | 5,37 |
| 57 | 0,927 | 519  | 379  | 437 | 499 | 522  | 547  | 589  | 10,54 | 5,08 |
| 58 | 0,989 | 554  | 143  | 418 | 534 | 558  | 585  | 663  | 10,10 | 5,20 |
| 59 | 1,010 | 514  | 310  | 364 | 493 | 517  | 541  | 628  | 9,65  | 4,96 |
| 60 | 0,981 | 579  | 222  | 448 | 559 | 584  | 612  | 687  | 10,34 | 5,29 |
| 61 | 0,915 | 733  | 581  | 653 | 713 | 744  | 781  | 826  | 11,99 | 5,94 |
| 62 | 1,088 | 667  | 804  | 347 | 647 | 676  | 708  | 929  | 9,77  | 5,46 |
| 63 | 0,985 | 626  | 191  | 484 | 606 | 633  | 664  | 746  | 10,57 | 5,51 |
| 64 | 0,777 | 560  | 492  | 517 | 540 | 565  | 591  | 611  | 12,90 | 5,42 |
| 65 | 0,785 | 558  | 491  | 516 | 538 | 563  | 589  | 609  | 12,76 | 5,41 |
| 66 | 0,705 | 367  | 299  | 312 | 346 | 364  | 380  | 404  | 12,35 | 4,55 |
| 67 | 0,632 | 309  | 214  | 239 | 288 | 304  | 317  | 348  | 13,02 | 4,28 |
| 68 | 0,884 | 353  | 283  | 296 | 332 | 350  | 365  | 389  | 9,72  | 4,36 |
| 69 | 1,176 | 612  | 1190 | 109 | 592 | 619  | 648  | 1093 | 8,78  | 5,18 |
| 70 | 1,379 | 798  | 889  | 939 | 778 | 811  | 852  | 785  | 8,18  | 5,70 |
| 71 | 0,658 | 328  | 245  | 263 | 307 | 324  | 337  | 365  | 12,74 | 4,36 |
| 72 | 0,662 | 326  | 246  | 263 | 305 | 322  | 336  | 363  | 12,65 | 4,37 |
| 73 | 0,657 | 328  | 244  | 263 | 307 | 324  | 337  | 366  | 12,76 | 4,38 |
| 74 | 0,670 | 331  | 254  | 269 | 310 | 327  | 341  | 368  | 12,56 | 4,39 |
| 75 | 0,672 | 336  | 259  | 274 | 315 | 333  | 347  | 373  | 12,60 | 4,41 |
| 76 | 0,665 | 331  | 251  | 268 | 310 | 327  | 341  | 368  | 12,66 | 4,41 |
| 77 | 0,675 | 335  | 260  | 274 | 314 | 332  | 346  | 371  | 12,52 | 4,42 |

|     |       |     |     |     |     |     |     |     |       |      |
|-----|-------|-----|-----|-----|-----|-----|-----|-----|-------|------|
| 78  | 0,694 | 352 | 282 | 295 | 331 | 349 | 364 | 388 | 12,39 | 4,48 |
| 79  | 0,703 | 364 | 295 | 308 | 343 | 362 | 377 | 401 | 12,37 | 4,52 |
| 80  | 0,711 | 366 | 300 | 312 | 345 | 364 | 379 | 402 | 12,24 | 4,53 |
| 81  | 0,696 | 365 | 294 | 308 | 344 | 363 | 378 | 403 | 12,49 | 4,53 |
| 82  | 0,709 | 367 | 300 | 312 | 346 | 365 | 381 | 403 | 12,29 | 4,54 |
| 83  | 0,708 | 367 | 300 | 312 | 346 | 365 | 381 | 403 | 12,30 | 4,54 |
| 84  | 0,713 | 370 | 304 | 316 | 349 | 368 | 384 | 406 | 12,25 | 4,56 |
| 85  | 0,716 | 373 | 308 | 320 | 352 | 371 | 387 | 409 | 12,23 | 4,57 |
| 86  | 0,714 | 382 | 315 | 328 | 361 | 380 | 397 | 419 | 12,36 | 4,61 |
| 87  | 0,727 | 383 | 320 | 331 | 362 | 381 | 398 | 419 | 12,15 | 4,62 |
| 88  | 0,724 | 387 | 322 | 334 | 366 | 385 | 402 | 424 | 12,25 | 4,62 |
| 89  | 0,723 | 383 | 319 | 331 | 362 | 381 | 398 | 420 | 12,22 | 4,62 |
| 90  | 0,721 | 387 | 321 | 334 | 366 | 385 | 402 | 425 | 12,31 | 4,63 |
| 91  | 0,730 | 387 | 324 | 336 | 366 | 385 | 402 | 424 | 12,15 | 4,64 |
| 92  | 0,727 | 394 | 329 | 342 | 373 | 393 | 410 | 432 | 12,27 | 4,66 |
| 93  | 0,739 | 385 | 325 | 335 | 364 | 383 | 400 | 421 | 11,98 | 4,67 |
| 94  | 0,735 | 390 | 328 | 340 | 369 | 389 | 406 | 427 | 12,10 | 4,68 |
| 95  | 0,746 | 406 | 345 | 357 | 385 | 405 | 423 | 443 | 12,07 | 4,74 |
| 96  | 0,747 | 397 | 337 | 348 | 376 | 396 | 413 | 433 | 11,97 | 4,74 |
| 97  | 0,740 | 400 | 338 | 350 | 379 | 399 | 416 | 437 | 12,12 | 4,79 |
| 98  | 0,868 | 437 | 363 | 382 | 416 | 437 | 457 | 481 | 10,64 | 4,80 |
| 99  | 0,777 | 412 | 354 | 366 | 391 | 411 | 430 | 448 | 11,64 | 4,88 |
| 100 | 0,762 | 434 | 373 | 387 | 414 | 434 | 454 | 474 | 12,08 | 4,96 |
| 101 | 0,971 | 519 | 260 | 405 | 499 | 523 | 547 | 610 | 10,07 | 5,04 |
| 102 | 0,961 | 497 | 288 | 394 | 476 | 499 | 522 | 577 | 10,03 | 5,04 |
| 103 | 0,980 | 594 | 236 | 462 | 573 | 600 | 628 | 704 | 10,43 | 5,05 |
| 104 | 0,969 | 518 | 267 | 406 | 498 | 521 | 546 | 607 | 10,08 | 5,05 |
| 105 | 0,681 | 532 | 427 | 466 | 511 | 535 | 560 | 593 | 14,48 | 5,11 |
| 106 | 0,973 | 518 | 246 | 402 | 497 | 521 | 545 | 609 | 10,04 | 5,12 |
| 107 | 0,973 | 519 | 247 | 403 | 498 | 522 | 546 | 610 | 10,04 | 5,08 |
| 108 | 0,955 | 518 | 319 | 417 | 497 | 521 | 545 | 600 | 10,23 | 5,12 |
| 109 | 0,936 | 509 | 356 | 422 | 488 | 511 | 535 | 580 | 10,37 | 5,14 |
| 110 | 0,966 | 538 | 294 | 426 | 518 | 542 | 568 | 629 | 10,24 | 5,23 |
| 111 | 0,972 | 535 | 266 | 419 | 515 | 539 | 564 | 629 | 10,17 | 5,23 |
| 112 | 0,848 | 553 | 476 | 504 | 532 | 557 | 583 | 607 | 11,78 | 5,37 |
| 113 | 0,663 | 335 | 253 | 271 | 314 | 332 | 346 | 373 | 12,75 | 4,41 |
| 114 | 0,694 | 363 | 291 | 305 | 342 | 361 | 376 | 401 | 12,51 | 4,52 |
| 115 | 0,700 | 370 | 299 | 314 | 349 | 368 | 384 | 408 | 12,48 | 4,55 |
| 116 | 0,706 | 377 | 308 | 322 | 356 | 375 | 391 | 415 | 12,45 | 4,57 |
| 117 | 0,711 | 382 | 314 | 328 | 361 | 380 | 397 | 420 | 12,42 | 4,61 |
| 118 | 0,728 | 373 | 311 | 322 | 352 | 371 | 387 | 408 | 12,03 | 4,62 |

|     |       |     |     |     |     |     |     |     |       |      |
|-----|-------|-----|-----|-----|-----|-----|-----|-----|-------|------|
| 119 | 0,720 | 374 | 310 | 321 | 353 | 372 | 388 | 410 | 12,18 | 4,62 |
| 120 | 0,721 | 377 | 313 | 324 | 356 | 375 | 391 | 413 | 12,19 | 4,62 |
| 121 | 0,726 | 380 | 317 | 328 | 359 | 378 | 395 | 416 | 12,14 | 4,64 |
| 122 | 0,744 | 385 | 326 | 336 | 364 | 383 | 400 | 420 | 11,90 | 4,66 |
| 123 | 0,738 | 386 | 325 | 336 | 365 | 384 | 401 | 422 | 12,00 | 4,67 |
| 124 | 0,742 | 388 | 328 | 339 | 367 | 386 | 403 | 424 | 11,96 | 4,67 |
| 125 | 0,737 | 389 | 328 | 339 | 368 | 388 | 405 | 425 | 12,06 | 4,69 |
| 126 | 0,748 | 389 | 330 | 340 | 368 | 388 | 405 | 424 | 11,87 | 4,69 |
| 127 | 0,736 | 390 | 328 | 340 | 369 | 389 | 406 | 426 | 12,08 | 4,70 |
| 128 | 0,753 | 400 | 340 | 352 | 379 | 399 | 416 | 436 | 11,91 | 4,74 |
| 129 | 0,755 | 400 | 341 | 352 | 379 | 399 | 417 | 436 | 11,87 | 4,74 |
| 130 | 0,747 | 403 | 342 | 354 | 382 | 402 | 420 | 440 | 12,03 | 4,75 |
| 131 | 0,743 | 401 | 340 | 352 | 380 | 400 | 418 | 438 | 12,08 | 4,74 |
| 132 | 0,750 | 406 | 346 | 358 | 385 | 405 | 423 | 443 | 12,01 | 4,76 |
| 133 | 0,756 | 407 | 348 | 359 | 386 | 406 | 424 | 444 | 11,93 | 4,77 |
| 134 | 0,756 | 420 | 359 | 372 | 399 | 420 | 438 | 458 | 12,06 | 4,84 |
| 135 | 0,767 | 426 | 366 | 379 | 405 | 426 | 445 | 464 | 11,94 | 4,84 |
| 136 | 0,772 | 420 | 361 | 374 | 399 | 420 | 438 | 458 | 11,80 | 4,84 |
| 137 | 0,773 | 421 | 362 | 375 | 400 | 421 | 440 | 459 | 11,80 | 4,84 |
| 138 | 0,768 | 420 | 361 | 373 | 399 | 420 | 438 | 458 | 11,87 | 4,84 |
| 139 | 0,774 | 425 | 366 | 379 | 404 | 425 | 444 | 463 | 11,82 | 4,86 |
| 140 | 0,777 | 426 | 367 | 380 | 405 | 426 | 445 | 464 | 11,79 | 4,87 |
| 141 | 0,767 | 429 | 369 | 382 | 408 | 428 | 448 | 467 | 11,96 | 4,87 |
| 142 | 0,771 | 426 | 367 | 380 | 405 | 426 | 445 | 464 | 11,87 | 4,87 |
| 143 | 0,769 | 432 | 372 | 385 | 411 | 432 | 451 | 470 | 11,96 | 4,89 |
| 144 | 0,776 | 431 | 372 | 385 | 410 | 431 | 450 | 470 | 11,84 | 4,89 |
| 145 | 0,779 | 432 | 373 | 386 | 411 | 432 | 452 | 471 | 11,81 | 4,89 |
| 146 | 0,780 | 438 | 379 | 392 | 417 | 438 | 458 | 477 | 11,85 | 4,92 |
| 147 | 0,790 | 469 | 408 | 424 | 449 | 470 | 492 | 511 | 11,97 | 5,03 |
| 148 | 0,789 | 463 | 402 | 418 | 443 | 464 | 485 | 505 | 11,93 | 5,04 |
| 149 | 0,796 | 469 | 408 | 424 | 449 | 470 | 492 | 511 | 11,88 | 5,06 |
| 150 | 0,797 | 473 | 411 | 428 | 453 | 475 | 496 | 516 | 11,89 | 5,08 |
| 151 | 0,803 | 469 | 407 | 424 | 449 | 470 | 492 | 511 | 11,77 | 5,08 |
| 152 | 0,800 | 480 | 418 | 435 | 460 | 482 | 504 | 523 | 11,91 | 5,11 |
| 153 | 0,806 | 480 | 417 | 435 | 460 | 482 | 504 | 524 | 11,82 | 5,11 |
| 154 | 0,803 | 487 | 424 | 442 | 466 | 489 | 512 | 531 | 11,93 | 5,14 |
| 155 | 0,805 | 434 | 375 | 388 | 413 | 434 | 453 | 472 | 11,44 | 4,97 |
| 156 | 0,740 | 400 | 338 | 350 | 379 | 399 | 416 | 437 | 12,12 | 4,79 |
| 157 | 0,762 | 434 | 373 | 387 | 414 | 434 | 454 | 474 | 12,08 | 4,96 |
| 158 | 0,808 | 480 | 417 | 435 | 459 | 481 | 504 | 523 | 11,78 | 5,09 |
| 159 | 0,862 | 559 | 476 | 507 | 539 | 564 | 591 | 616 | 11,63 | 5,43 |



|     |       |     |     |     |     |     |      |      |       |      |
|-----|-------|-----|-----|-----|-----|-----|------|------|-------|------|
| 160 | 0,848 | 553 | 476 | 504 | 532 | 557 | 583  | 607  | 11,78 | 5,37 |
| 161 | 0,947 | 494 | 322 | 401 | 473 | 496 | 519  | 568  | 10,15 | 4,97 |
| 162 | 0,950 | 514 | 330 | 417 | 493 | 516 | 541  | 592  | 10,26 | 5,08 |
| 163 | 0,955 | 541 | 337 | 439 | 521 | 545 | 571  | 627  | 10,39 | 5,17 |
| 164 | 0,982 | 567 | 201 | 437 | 547 | 572 | 599  | 673  | 10,25 | 5,28 |
| 165 | 0,990 | 598 | 159 | 455 | 578 | 604 | 633  | 716  | 10,35 | 5,36 |
| 166 | 1,022 | 623 | 448 | 434 | 603 | 630 | 660  | 776  | 10,17 | 5,45 |
| 167 | 1,069 | 647 | 693 | 373 | 626 | 654 | 686  | 867  | 9,84  | 5,52 |
| 168 | 1,046 | 667 | 607 | 428 | 647 | 675 | 708  | 860  | 10,16 | 5,57 |
| 169 | 0,963 | 547 | 312 | 437 | 527 | 551 | 577  | 638  | 10,33 | 5,25 |
| 170 | 0,972 | 575 | 289 | 454 | 555 | 580 | 608  | 676  | 10,41 | 5,34 |
| 171 | 0,985 | 600 | 179 | 462 | 580 | 606 | 635  | 714  | 10,42 | 5,40 |
| 172 | 0,999 | 626 | 292 | 467 | 606 | 633 | 663  | 757  | 10,41 | 5,48 |
| 173 | 1,026 | 664 | 501 | 459 | 644 | 672 | 705  | 831  | 10,34 | 5,59 |
| 174 | 1,047 | 699 | 639 | 451 | 679 | 709 | 744  | 903  | 10,31 | 5,72 |
| 175 | 1,066 | 723 | 761 | 428 | 703 | 733 | 769  | 964  | 10,24 | 5,84 |
| 176 | 1,082 | 738 | 860 | 403 | 718 | 749 | 785  | 1015 | 10,16 | 5,81 |
| 177 | 0,907 | 518 | 404 | 447 | 498 | 521 | 546  | 581  | 10,77 | 5,17 |
| 178 | 0,924 | 544 | 403 | 462 | 523 | 548 | 574  | 616  | 10,74 | 5,27 |
| 179 | 0,940 | 570 | 394 | 476 | 549 | 575 | 602  | 653  | 10,72 | 5,35 |
| 180 | 0,953 | 596 | 381 | 490 | 576 | 602 | 631  | 689  | 10,74 | 5,45 |
| 181 | 0,968 | 619 | 336 | 496 | 599 | 626 | 656  | 726  | 10,71 | 5,54 |
| 182 | 0,979 | 651 | 280 | 513 | 631 | 659 | 691  | 771  | 10,77 | 5,63 |
| 183 | 0,972 | 571 | 286 | 450 | 551 | 577 | 604  | 672  | 10,39 | 5,31 |
| 184 | 0,978 | 595 | 256 | 465 | 575 | 601 | 629  | 704  | 10,46 | 5,41 |
| 185 | 0,987 | 622 | 122 | 478 | 602 | 629 | 659  | 743  | 10,52 | 5,50 |
| 186 | 1,015 | 647 | 423 | 463 | 627 | 655 | 687  | 798  | 10,37 | 5,55 |
| 187 | 1,025 | 666 | 495 | 463 | 646 | 674 | 707  | 832  | 10,36 | 5,57 |
| 188 | 1,044 | 693 | 620 | 451 | 673 | 703 | 737  | 891  | 10,31 | 5,74 |
| 189 | 1,032 | 742 | 593 | 510 | 722 | 754 | 791  | 937  | 10,67 | 5,83 |
| 190 | 1,008 | 750 | 426 | 557 | 730 | 762 | 799  | 917  | 10,97 | 5,92 |
| 191 | 1,022 | 765 | 544 | 546 | 745 | 777 | 816  | 953  | 10,89 | 5,99 |
| 192 | 1,022 | 783 | 556 | 560 | 763 | 796 | 835  | 975  | 10,97 | 6,15 |
| 193 | 1,022 | 808 | 572 | 580 | 788 | 822 | 863  | 1006 | 11,09 | 6,19 |
| 194 | 0,907 | 742 | 602 | 668 | 722 | 754 | 791  | 833  | 12,14 | 5,87 |
| 195 | 0,906 | 750 | 610 | 677 | 730 | 762 | 799  | 841  | 12,20 | 5,97 |
| 196 | 0,916 | 765 | 607 | 683 | 745 | 777 | 816  | 863  | 12,14 | 6,04 |
| 197 | 0,920 | 783 | 616 | 698 | 763 | 796 | 835  | 885  | 12,19 | 6,11 |
| 198 | 0,921 | 808 | 635 | 721 | 788 | 822 | 863  | 914  | 12,30 | 6,16 |
| 199 | 0,923 | 942 | 754 | 853 | 923 | 961 | 1009 | 1064 | 12,93 | 6,67 |
| 200 | 0,918 | 950 | 772 | 866 | 931 | 969 | 1018 | 1070 | 13,02 | 6,84 |

|     |       |      |     |     |     |      |      |      |       |      |
|-----|-------|------|-----|-----|-----|------|------|------|-------|------|
| 201 | 0,920 | 965  | 782 | 879 | 946 | 985  | 1034 | 1088 | 13,07 | 6,97 |
| 202 | 0,916 | 983  | 807 | 902 | 964 | 1003 | 1054 | 1106 | 13,20 | 7,02 |
| 203 | 0,919 | 1008 | 825 | 924 | 989 | 1029 | 1081 | 1135 | 13,28 | 7,16 |
| 204 | 1,013 | 888  | 539 | 662 | 869 | 905  | 950  | 1092 | 11,54 | 6,58 |
| 205 | 1,013 | 893  | 542 | 666 | 873 | 910  | 955  | 1098 | 11,56 | 6,59 |
| 206 | 1,013 | 890  | 540 | 663 | 870 | 906  | 952  | 1094 | 11,55 | 6,58 |
| 207 | 1,013 | 895  | 543 | 667 | 875 | 912  | 957  | 1100 | 11,57 | 6,59 |
| 208 | 0,925 | 892  | 703 | 801 | 873 | 909  | 955  | 1010 | 12,66 | 6,58 |
| 209 | 0,924 | 886  | 700 | 796 | 867 | 903  | 948  | 1003 | 12,65 | 6,58 |
| 210 | 0,925 | 900  | 710 | 809 | 881 | 917  | 963  | 1019 | 12,70 | 6,57 |
| 211 | 0,903 | 698  | 568 | 627 | 678 | 708  | 743  | 782  | 11,95 | 5,85 |
| 212 | 0,919 | 731  | 571 | 647 | 711 | 742  | 778  | 826  | 11,92 | 5,94 |
| 213 | 0,896 | 724  | 600 | 658 | 704 | 735  | 771  | 808  | 12,19 | 5,95 |
| 214 | 0,932 | 744  | 557 | 649 | 724 | 755  | 792  | 847  | 11,83 | 6,03 |
| 215 | 0,905 | 739  | 602 | 667 | 719 | 751  | 787  | 829  | 12,15 | 6,05 |
| 216 | 0,913 | 718  | 570 | 639 | 698 | 729  | 764  | 809  | 11,92 | 5,90 |
| 217 | 0,922 | 711  | 549 | 626 | 691 | 721  | 756  | 805  | 11,78 | 5,88 |
| 218 | 0,897 | 631  | 514 | 564 | 611 | 638  | 669  | 705  | 11,64 | 5,65 |
| 219 | 0,871 | 744  | 644 | 692 | 724 | 755  | 792  | 822  | 12,65 | 6,08 |
| 220 | 1,003 | 738  | 370 | 555 | 718 | 749  | 786  | 897  | 10,96 | 5,94 |
| 221 | 0,655 | 342  | 254 | 276 | 321 | 339  | 353  | 383  | 12,99 | 4,46 |
| 222 | 0,684 | 372  | 293 | 311 | 351 | 369  | 385  | 412  | 12,79 | 4,61 |
| 223 | 0,718 | 424  | 353 | 370 | 403 | 424  | 443  | 466  | 12,74 | 4,85 |
| 224 | 0,749 | 489  | 421 | 442 | 469 | 491  | 514  | 536  | 12,80 | 5,14 |
| 225 | 0,756 | 507  | 439 | 461 | 487 | 510  | 534  | 555  | 12,82 | 5,22 |
| 226 | 0,763 | 527  | 459 | 482 | 506 | 530  | 555  | 576  | 12,88 | 5,29 |
| 227 | 0,776 | 543  | 476 | 500 | 523 | 547  | 573  | 593  | 12,78 | 5,35 |
| 228 | 0,773 | 560  | 492 | 517 | 540 | 565  | 591  | 612  | 12,97 | 5,42 |
| 229 | 0,785 | 575  | 508 | 533 | 555 | 580  | 608  | 628  | 12,88 | 5,47 |
| 230 | 0,777 | 590  | 521 | 549 | 570 | 596  | 624  | 644  | 13,14 | 5,54 |
| 231 | 0,786 | 603  | 534 | 563 | 583 | 609  | 639  | 658  | 13,08 | 5,59 |
| 232 | 0,867 | 409  | 338 | 355 | 388 | 408  | 426  | 450  | 10,42 | 4,67 |
| 233 | 0,862 | 432  | 361 | 379 | 411 | 432  | 452  | 475  | 10,67 | 4,79 |
| 234 | 0,860 | 456  | 383 | 404 | 436 | 457  | 478  | 502  | 10,89 | 4,90 |
| 235 | 0,864 | 412  | 342 | 358 | 391 | 411  | 430  | 453  | 10,48 | 4,67 |
| 236 | 0,857 | 513  | 436 | 461 | 493 | 516  | 540  | 564  | 11,37 | 5,17 |
| 237 | 1,025 | 491  | 366 | 329 | 471 | 493  | 516  | 612  | 9,36  | 4,85 |
| 238 | 1,020 | 518  | 364 | 355 | 497 | 521  | 545  | 641  | 9,57  | 4,96 |
| 239 | 0,937 | 639  | 457 | 544 | 619 | 647  | 678  | 731  | 11,18 | 5,54 |
| 240 | 0,640 | 303  | 216 | 236 | 282 | 298  | 310  | 340  | 12,76 | 4,25 |
| 241 | 0,674 | 337  | 260 | 275 | 316 | 333  | 347  | 373  | 12,55 | 4,43 |

|     |       |     |     |     |     |     |      |      |       |      |
|-----|-------|-----|-----|-----|-----|-----|------|------|-------|------|
| 242 | 0,697 | 367 | 295 | 310 | 346 | 364 | 380  | 404  | 12,49 | 4,59 |
| 243 | 0,714 | 394 | 325 | 340 | 373 | 393 | 410  | 433  | 12,49 | 4,72 |
| 244 | 0,982 | 388 | 131 | 285 | 367 | 386 | 403  | 458  | 9,04  | 4,37 |
| 245 | 1,020 | 457 | 319 | 309 | 437 | 458 | 479  | 565  | 9,19  | 4,53 |
| 246 | 1,170 | 527 | 980 | 106 | 507 | 531 | 555  | 916  | 8,40  | 4,76 |
| 247 | 1,090 | 510 | 615 | 254 | 490 | 513 | 537  | 711  | 8,92  | 4,86 |
| 248 | 0,854 | 658 | 573 | 610 | 638 | 666 | 699  | 724  | 12,39 | 5,71 |
| 249 | 0,854 | 646 | 562 | 598 | 626 | 654 | 686  | 711  | 12,31 | 5,66 |
| 250 | 0,855 | 632 | 548 | 583 | 612 | 639 | 670  | 695  | 12,21 | 5,61 |
| 251 | 0,815 | 404 | 347 | 358 | 383 | 403 | 421  | 440  | 11,04 | 4,97 |
| 252 | 0,894 | 535 | 432 | 470 | 515 | 539 | 564  | 596  | 11,05 | 5,41 |
| 253 | 0,970 | 702 | 386 | 569 | 682 | 712 | 747  | 824  | 11,15 | 5,96 |
| 254 | 0,925 | 826 | 643 | 735 | 806 | 840 | 882  | 935  | 12,34 | 6,43 |
| 255 | 0,860 | 736 | 645 | 689 | 716 | 747 | 784  | 810  | 12,78 | 5,93 |
| 256 | 0,868 | 748 | 650 | 698 | 728 | 760 | 797  | 826  | 12,72 | 6,00 |
| 257 | 0,925 | 736 | 564 | 647 | 716 | 747 | 784  | 835  | 11,87 | 6,03 |
| 258 | 0,877 | 698 | 595 | 642 | 678 | 708 | 742  | 773  | 12,30 | 5,91 |
| 259 | 0,898 | 728 | 602 | 661 | 708 | 739 | 775  | 813  | 12,19 | 6,01 |
| 260 | 0,801 | 700 | 629 | 664 | 680 | 710 | 745  | 764  | 13,48 | 6,05 |
| 261 | 0,863 | 655 | 565 | 604 | 635 | 663 | 695  | 722  | 12,25 | 5,65 |
| 262 | 0,910 | 666 | 529 | 590 | 646 | 675 | 707  | 749  | 11,67 | 5,73 |
| 263 | 0,930 | 735 | 553 | 642 | 715 | 746 | 783  | 836  | 11,80 | 6,20 |
| 264 | 0,903 | 736 | 602 | 665 | 716 | 747 | 784  | 824  | 12,17 | 6,07 |
| 265 | 0,941 | 718 | 512 | 615 | 698 | 728 | 764  | 823  | 11,58 | 5,91 |
| 266 | 0,953 | 693 | 455 | 580 | 673 | 703 | 737  | 802  | 11,30 | 5,72 |
| 267 | 1,059 | 733 | 737 | 450 | 713 | 744 | 781  | 967  | 10,35 | 5,85 |
| 268 | 0,982 | 656 | 257 | 515 | 636 | 665 | 697  | 780  | 10,77 | 5,81 |
| 269 | 0,991 | 714 | 165 | 552 | 694 | 724 | 759  | 856  | 10,97 | 6,04 |
| 270 | 1,004 | 748 | 387 | 562 | 728 | 760 | 797  | 911  | 11,00 | 6,15 |
| 271 | 1,007 | 786 | 435 | 588 | 766 | 799 | 838  | 960  | 11,14 | 6,26 |
| 272 | 1,014 | 824 | 516 | 607 | 804 | 838 | 880  | 1015 | 11,25 | 6,39 |
| 273 | 1,021 | 861 | 595 | 625 | 842 | 877 | 921  | 1070 | 11,34 | 6,52 |
| 274 | 1,024 | 899 | 647 | 647 | 879 | 916 | 962  | 1121 | 11,46 | 6,63 |
| 275 | 1,024 | 944 | 675 | 683 | 924 | 963 | 1011 | 1177 | 11,65 | 6,77 |
| 276 | 0,969 | 643 | 347 | 516 | 622 | 650 | 682  | 754  | 10,83 | 5,80 |
| 277 | 0,979 | 702 | 319 | 558 | 682 | 712 | 747  | 831  | 11,05 | 5,99 |
| 278 | 0,979 | 748 | 350 | 599 | 728 | 760 | 797  | 885  | 11,29 | 6,15 |
| 279 | 0,979 | 786 | 376 | 633 | 766 | 799 | 838  | 930  | 11,47 | 6,31 |
| 280 | 0,988 | 825 | 265 | 654 | 806 | 840 | 882  | 986  | 11,55 | 6,41 |
| 281 | 1,004 | 866 | 428 | 661 | 847 | 882 | 926  | 1054 | 11,55 | 6,56 |
| 282 | 1,011 | 896 | 518 | 673 | 876 | 913 | 959  | 1098 | 11,60 | 6,67 |

|     |       |     |     |     |     |      |      |      |       |      |
|-----|-------|-----|-----|-----|-----|------|------|------|-------|------|
| 283 | 1,014 | 946 | 578 | 707 | 927 | 965  | 1013 | 1164 | 11,78 | 6,86 |
| 284 | 0,954 | 623 | 397 | 514 | 603 | 630  | 660  | 722  | 10,89 | 5,72 |
| 285 | 0,960 | 698 | 430 | 576 | 678 | 707  | 742  | 812  | 11,24 | 6,02 |
| 286 | 0,985 | 749 | 273 | 592 | 729 | 761  | 798  | 892  | 11,22 | 6,17 |
| 287 | 0,991 | 795 | 39  | 622 | 776 | 809  | 849  | 954  | 11,37 | 6,31 |
| 288 | 0,998 | 824 | 317 | 637 | 805 | 839  | 880  | 995  | 11,43 | 6,43 |
| 289 | 1,004 | 862 | 426 | 657 | 842 | 878  | 922  | 1048 | 11,53 | 6,51 |
| 290 | 1,011 | 890 | 516 | 668 | 871 | 907  | 953  | 1092 | 11,58 | 6,63 |
| 291 | 1,014 | 925 | 568 | 691 | 906 | 944  | 991  | 1139 | 11,69 | 6,72 |
| 292 | 1,014 | 981 | 594 | 737 | 962 | 1002 | 1052 | 1207 | 11,92 | 6,84 |
| 293 | 0,988 | 647 | 114 | 499 | 627 | 655  | 687  | 773  | 10,65 | 5,75 |
| 294 | 0,988 | 707 | 170 | 551 | 687 | 717  | 752  | 845  | 10,97 | 5,95 |
| 295 | 0,988 | 748 | 204 | 586 | 728 | 760  | 797  | 894  | 11,18 | 6,11 |
| 296 | 0,998 | 789 | 313 | 607 | 769 | 802  | 842  | 953  | 11,27 | 6,24 |
| 297 | 0,994 | 825 | 241 | 643 | 806 | 840  | 882  | 993  | 11,48 | 6,38 |
| 298 | 1,014 | 836 | 522 | 617 | 816 | 851  | 893  | 1030 | 11,30 | 6,40 |
| 299 | 1,017 | 876 | 575 | 644 | 857 | 893  | 937  | 1084 | 11,44 | 6,54 |
| 300 | 1,024 | 934 | 670 | 676 | 915 | 953  | 1001 | 1166 | 11,61 | 6,73 |
| 301 | 1,038 | 968 | 809 | 669 | 949 | 988  | 1038 | 1232 | 11,59 | 6,83 |
| 302 | 0,931 | 655 | 483 | 564 | 635 | 663  | 695  | 746  | 11,35 | 5,81 |
| 303 | 0,954 | 709 | 462 | 593 | 689 | 719  | 754  | 821  | 11,37 | 6,06 |
| 304 | 0,972 | 787 | 428 | 643 | 767 | 800  | 840  | 926  | 11,55 | 6,29 |
| 305 | 0,991 | 860 | 185 | 678 | 840 | 876  | 919  | 1030 | 11,67 | 6,51 |
| 306 | 1,011 | 920 | 529 | 693 | 901 | 938  | 985  | 1128 | 11,71 | 6,77 |
| 307 | 0,913 | 656 | 515 | 578 | 636 | 664  | 696  | 739  | 11,57 | 5,75 |
| 308 | 0,927 | 696 | 527 | 607 | 676 | 706  | 740  | 790  | 11,63 | 5,85 |
| 309 | 0,930 | 726 | 545 | 633 | 706 | 737  | 773  | 826  | 11,75 | 5,94 |
| 310 | 0,938 | 746 | 544 | 645 | 726 | 758  | 795  | 853  | 11,77 | 6,02 |
| 311 | 0,795 | 509 | 445 | 466 | 489 | 512  | 536  | 556  | 12,22 | 5,28 |
| 312 | 0,785 | 465 | 404 | 420 | 445 | 466  | 488  | 507  | 12,01 | 5,00 |
| 313 | 0,865 | 561 | 476 | 508 | 541 | 566  | 593  | 619  | 11,61 | 5,33 |
| 314 | 0,921 | 695 | 537 | 611 | 675 | 704  | 738  | 785  | 11,70 | 6,00 |
| 315 | 0,877 | 635 | 537 | 578 | 615 | 643  | 674  | 704  | 11,93 | 5,62 |
| 316 | 0,899 | 569 | 457 | 502 | 549 | 574  | 601  | 636  | 11,22 | 5,43 |
| 317 | 0,906 | 690 | 556 | 617 | 670 | 700  | 734  | 774  | 11,87 | 5,87 |
| 318 | 0,905 | 626 | 501 | 554 | 606 | 633  | 663  | 702  | 11,50 | 5,61 |
| 319 | 0,884 | 616 | 513 | 555 | 595 | 622  | 652  | 684  | 11,71 | 5,60 |
| 320 | 0,884 | 643 | 538 | 583 | 623 | 651  | 682  | 714  | 11,88 | 5,52 |
| 321 | 0,904 | 634 | 509 | 563 | 614 | 642  | 673  | 711  | 11,56 | 5,64 |
| 322 | 0,905 | 639 | 512 | 567 | 619 | 647  | 678  | 716  | 11,58 | 5,77 |
| 323 | 0,945 | 634 | 433 | 532 | 614 | 641  | 672  | 729  | 11,06 | 5,81 |

|     |       |     |     |     |     |     |     |     |       |      |
|-----|-------|-----|-----|-----|-----|-----|-----|-----|-------|------|
| 324 | 0,906 | 642 | 513 | 569 | 622 | 650 | 681 | 720 | 11,58 | 5,69 |
| 325 | 0,957 | 621 | 386 | 509 | 600 | 628 | 658 | 720 | 10,84 | 5,63 |
| 326 | 0,909 | 651 | 517 | 576 | 631 | 659 | 691 | 731 | 11,59 | 5,78 |
| 327 | 0,964 | 704 | 418 | 578 | 684 | 714 | 749 | 822 | 11,23 | 5,90 |
| 328 | 0,892 | 638 | 525 | 574 | 618 | 646 | 677 | 711 | 11,74 | 5,70 |
| 329 | 0,686 | 337 | 266 | 279 | 316 | 333 | 348 | 372 | 12,35 | 4,43 |
| 330 | 0,723 | 365 | 303 | 313 | 344 | 363 | 378 | 400 | 12,03 | 4,56 |
| 331 | 0,746 | 390 | 330 | 341 | 369 | 388 | 405 | 425 | 11,92 | 4,67 |
| 332 | 0,765 | 415 | 356 | 368 | 395 | 415 | 433 | 453 | 11,87 | 4,80 |
| 333 | 0,779 | 439 | 379 | 393 | 418 | 439 | 459 | 478 | 11,87 | 4,90 |
| 334 | 0,790 | 460 | 399 | 415 | 440 | 461 | 482 | 502 | 11,89 | 4,99 |
| 335 | 0,801 | 481 | 419 | 437 | 461 | 483 | 505 | 525 | 11,91 | 5,08 |
| 336 | 0,812 | 500 | 436 | 456 | 480 | 503 | 526 | 546 | 11,90 | 5,16 |
| 337 | 0,823 | 520 | 452 | 474 | 499 | 523 | 547 | 568 | 11,89 | 5,19 |
| 338 | 0,833 | 539 | 469 | 493 | 519 | 543 | 569 | 590 | 11,89 | 5,33 |
| 339 | 0,840 | 556 | 483 | 510 | 536 | 561 | 587 | 610 | 11,92 | 5,40 |
| 340 | 0,848 | 573 | 495 | 525 | 553 | 578 | 606 | 629 | 11,92 | 5,47 |
| 341 | 0,853 | 586 | 506 | 537 | 566 | 592 | 620 | 645 | 11,94 | 5,53 |
| 342 | 0,858 | 598 | 514 | 548 | 578 | 604 | 633 | 658 | 11,95 | 5,57 |
| 343 | 0,883 | 611 | 510 | 551 | 591 | 618 | 647 | 678 | 11,69 | 5,62 |
| 344 | 0,868 | 624 | 533 | 571 | 604 | 631 | 662 | 689 | 11,98 | 5,67 |
| 345 | 0,873 | 636 | 541 | 581 | 616 | 644 | 675 | 704 | 11,99 | 5,72 |
| 346 | 0,878 | 648 | 548 | 591 | 628 | 656 | 688 | 718 | 11,99 | 5,76 |
| 347 | 0,882 | 659 | 555 | 600 | 639 | 668 | 700 | 731 | 12,01 | 5,80 |
| 348 | 0,886 | 670 | 561 | 609 | 650 | 679 | 712 | 745 | 12,02 | 5,84 |
| 349 | 0,890 | 681 | 567 | 618 | 661 | 690 | 724 | 758 | 12,03 | 5,88 |
| 350 | 0,894 | 691 | 572 | 626 | 671 | 700 | 735 | 770 | 12,03 | 5,92 |
| 351 | 0,897 | 701 | 578 | 634 | 681 | 711 | 745 | 783 | 12,05 | 5,96 |
| 352 | 0,900 | 709 | 582 | 640 | 689 | 719 | 755 | 793 | 12,06 | 6,00 |
| 353 | 0,903 | 719 | 586 | 648 | 699 | 729 | 765 | 805 | 12,07 | 6,03 |
| 354 | 0,907 | 728 | 589 | 654 | 708 | 738 | 775 | 816 | 12,07 | 6,06 |
| 355 | 0,910 | 736 | 592 | 660 | 717 | 748 | 784 | 828 | 12,07 | 6,10 |
| 356 | 0,913 | 745 | 595 | 666 | 725 | 756 | 793 | 838 | 12,08 | 6,13 |
| 357 | 0,915 | 753 | 598 | 672 | 733 | 764 | 802 | 848 | 12,10 | 6,16 |
| 358 | 0,918 | 760 | 599 | 677 | 740 | 772 | 810 | 858 | 12,09 | 6,19 |
| 359 | 0,920 | 768 | 603 | 683 | 748 | 780 | 818 | 867 | 12,11 | 6,21 |
| 360 | 0,923 | 773 | 601 | 686 | 753 | 786 | 824 | 875 | 12,10 | 6,24 |
| 361 | 0,925 | 781 | 605 | 692 | 762 | 794 | 834 | 886 | 12,12 | 6,27 |
| 362 | 0,929 | 788 | 602 | 695 | 768 | 801 | 841 | 895 | 12,10 | 6,30 |
| 363 | 0,929 | 795 | 608 | 702 | 776 | 809 | 849 | 904 | 12,13 | 6,32 |
| 364 | 0,931 | 801 | 608 | 705 | 781 | 814 | 855 | 911 | 12,14 | 6,35 |

|     |       |     |      |      |     |     |     |      |       |      |
|-----|-------|-----|------|------|-----|-----|-----|------|-------|------|
| 365 | 0,932 | 807 | 611  | 710  | 787 | 821 | 861 | 919  | 12,15 | 6,37 |
| 366 | 0,934 | 813 | 611  | 714  | 793 | 827 | 868 | 927  | 12,16 | 6,39 |
| 367 | 0,936 | 820 | 612  | 719  | 801 | 835 | 876 | 936  | 12,17 | 6,42 |
| 368 | 0,938 | 826 | 611  | 722  | 806 | 840 | 882 | 944  | 12,17 | 6,44 |
| 369 | 1,527 | 811 | 1149 | 2300 | 791 | 825 | 866 | 455  | 7,43  | 6,00 |
| 370 | 1,483 | 826 | 1143 | 1885 | 806 | 841 | 882 | 541  | 7,70  | 6,03 |
| 371 | 1,451 | 828 | 1111 | 1578 | 808 | 843 | 885 | 613  | 7,87  | 6,07 |
| 372 | 1,420 | 844 | 1081 | 1336 | 825 | 859 | 902 | 702  | 8,09  | 6,10 |
| 373 | 1,285 | 865 | 1243 | 374  | 846 | 881 | 925 | 1292 | 9,02  | 6,30 |
| 374 | 1,173 | 911 | 1781 | 182  | 892 | 929 | 975 | 1623 | 10,05 | 6,53 |
| 375 | 0,911 | 811 | 657  | 733  | 791 | 825 | 866 | 912  | 12,45 | 6,22 |
| 376 | 0,941 | 824 | 599  | 716  | 805 | 839 | 880 | 945  | 12,12 | 6,31 |
| 377 | 0,875 | 744 | 641  | 691  | 724 | 755 | 793 | 823  | 12,60 | 5,96 |
| 378 | 1,049 | 747 | 694  | 481  | 727 | 759 | 796 | 968  | 10,52 | 5,99 |
| 379 | 0,902 | 582 | 465  | 512  | 562 | 587 | 615 | 652  | 11,26 | 5,46 |
| 380 | 0,925 | 594 | 443  | 510  | 574 | 600 | 629 | 674  | 11,05 | 5,55 |
| 381 | 0,946 | 619 | 419  | 517  | 599 | 626 | 656 | 712  | 10,96 | 5,71 |
| 382 | 0,961 | 643 | 387  | 525  | 623 | 651 | 682 | 749  | 10,93 | 5,80 |
| 383 | 0,970 | 668 | 359  | 538  | 648 | 677 | 709 | 784  | 10,96 | 5,94 |
| 384 | 0,981 | 703 | 297  | 556  | 683 | 713 | 748 | 834  | 11,03 | 5,99 |
| 385 | 0,993 | 727 | 217  | 561  | 707 | 738 | 774 | 874  | 11,02 | 6,16 |
| 386 | 0,998 | 762 | 311  | 584  | 742 | 774 | 812 | 920  | 11,14 | 6,25 |
| 387 | 0,863 | 582 | 497  | 530  | 562 | 587 | 615 | 641  | 11,78 | 5,33 |
| 388 | 0,903 | 594 | 474  | 523  | 574 | 600 | 629 | 665  | 11,32 | 5,58 |
| 389 | 0,921 | 619 | 471  | 537  | 599 | 626 | 656 | 700  | 11,26 | 5,65 |
| 390 | 0,933 | 643 | 470  | 551  | 623 | 651 | 682 | 733  | 11,26 | 5,79 |
| 391 | 0,944 | 668 | 461  | 564  | 648 | 677 | 709 | 768  | 11,26 | 5,84 |
| 392 | 0,955 | 703 | 456  | 587  | 683 | 713 | 748 | 814  | 11,33 | 6,01 |
| 393 | 0,968 | 727 | 413  | 594  | 707 | 738 | 774 | 852  | 11,30 | 6,08 |
| 394 | 0,971 | 762 | 418  | 622  | 742 | 774 | 812 | 895  | 11,44 | 6,15 |
| 395 | 0,916 | 582 | 447  | 504  | 562 | 587 | 615 | 656  | 11,09 | 5,45 |
| 396 | 0,900 | 594 | 477  | 525  | 574 | 600 | 629 | 664  | 11,36 | 5,64 |
| 397 | 0,902 | 619 | 498  | 549  | 599 | 626 | 656 | 693  | 11,50 | 5,72 |
| 398 | 0,900 | 643 | 521  | 574  | 623 | 651 | 682 | 719  | 11,66 | 5,86 |
| 399 | 0,895 | 668 | 549  | 602  | 648 | 677 | 709 | 745  | 11,88 | 5,96 |
| 400 | 0,879 | 703 | 599  | 646  | 683 | 713 | 748 | 779  | 12,31 | 6,07 |
| 401 | 0,867 | 727 | 631  | 677  | 707 | 738 | 774 | 802  | 12,62 | 6,10 |
| 402 | 0,984 | 762 | 296  | 604  | 742 | 774 | 812 | 907  | 11,29 | 6,17 |
| 403 | 0,871 | 582 | 491  | 527  | 562 | 587 | 615 | 643  | 11,66 | 5,42 |
| 404 | 0,903 | 594 | 474  | 524  | 574 | 600 | 629 | 665  | 11,32 | 5,56 |
| 405 | 0,920 | 619 | 473  | 537  | 599 | 626 | 656 | 700  | 11,27 | 5,69 |

|     |       |     |      |     |     |     |     |      |       |      |
|-----|-------|-----|------|-----|-----|-----|-----|------|-------|------|
| 406 | 0,928 | 643 | 479  | 555 | 623 | 651 | 682 | 731  | 11,31 | 5,82 |
| 407 | 0,938 | 668 | 478  | 570 | 648 | 677 | 709 | 764  | 11,34 | 5,92 |
| 408 | 0,950 | 703 | 472  | 592 | 683 | 713 | 748 | 812  | 11,38 | 6,02 |
| 409 | 0,960 | 727 | 452  | 603 | 707 | 738 | 774 | 846  | 11,39 | 6,18 |
| 410 | 0,963 | 762 | 467  | 632 | 742 | 774 | 812 | 889  | 11,54 | 6,20 |
| 411 | 0,951 | 582 | 376  | 478 | 562 | 587 | 615 | 672  | 10,68 | 5,42 |
| 412 | 0,972 | 594 | 302  | 471 | 574 | 600 | 629 | 698  | 10,53 | 5,56 |
| 413 | 0,986 | 619 | 167  | 477 | 599 | 626 | 656 | 738  | 10,52 | 5,66 |
| 414 | 0,959 | 643 | 395  | 527 | 623 | 651 | 682 | 748  | 10,95 | 5,78 |
| 415 | 0,986 | 668 | 204  | 520 | 648 | 677 | 709 | 796  | 10,79 | 5,92 |
| 416 | 1,008 | 703 | 407  | 518 | 683 | 713 | 748 | 860  | 10,73 | 6,11 |
| 417 | 0,951 | 727 | 486  | 613 | 707 | 738 | 774 | 840  | 11,50 | 6,14 |
| 418 | 0,977 | 762 | 375  | 614 | 742 | 774 | 812 | 900  | 11,37 | 6,30 |
| 419 | 0,997 | 582 | 256  | 433 | 562 | 587 | 615 | 702  | 10,19 | 5,45 |
| 420 | 1,177 | 594 | 1157 | 103 | 574 | 600 | 629 | 1063 | 8,69  | 5,56 |
| 421 | 1,101 | 619 | 802  | 293 | 599 | 626 | 656 | 886  | 9,42  | 5,67 |
| 422 | 0,905 | 643 | 515  | 571 | 623 | 651 | 682 | 721  | 11,60 | 5,83 |
| 423 | 0,912 | 668 | 528  | 591 | 648 | 677 | 709 | 752  | 11,66 | 5,94 |
| 424 | 0,922 | 703 | 542  | 618 | 683 | 713 | 748 | 796  | 11,73 | 5,99 |
| 425 | 0,971 | 727 | 394  | 590 | 707 | 738 | 774 | 854  | 11,26 | 6,09 |
| 426 | 0,986 | 762 | 254  | 601 | 742 | 774 | 812 | 909  | 11,27 | 6,21 |
| 427 | 1,002 | 810 | 384  | 617 | 790 | 824 | 865 | 983  | 11,32 | 6,33 |
| 428 | 0,997 | 800 | 307  | 617 | 780 | 814 | 854 | 966  | 11,33 | 6,37 |
| 429 | 1,006 | 860 | 447  | 653 | 840 | 876 | 919 | 1048 | 11,50 | 6,40 |
| 430 | 0,978 | 840 | 420  | 682 | 820 | 855 | 898 | 993  | 11,74 | 6,48 |

## References

1. Lemus, M.C.S. Extended distillation and property correlations for heavy oil. PhD Thesis, University of Calgary, Calgary, Canada, December 2015.
2. Lemus, M.C.S.; Schoeggl, F.; Taylor, S.D.; Yarranton, H.W. Physical properties of heavy oil distillation cuts. *Fuel* **2016**, *180*, 457–472.
3. Nji, G.N. Characterization of heavy oils and bitumens. PhD Thesis, University of Calgary, Calgary, Canada, January 2010.
4. Al-Mhanna, N.M. Simulation of High Pressure Separator Used in Crude Oil Processing. *Processes* **2018**, *6*, 219. <https://doi.org/10.3390/pr6110219>.
5. Aladwani, H.A.; Riazi, M.R. Some guidelines for choosing a characterization method for petroleum fractions in process simulators. *Trans IChemE Part A Chem. Eng. Res. Des.* **2005**, *83*, 160–166.
6. Schneider, D.F. Select the right hydrocarbon molecular weight correlation. Available online: <https://www.stratusengr.com/Articles/MoleWt.pdf> (accesses on 17 November 2022).
7. Powers, D.P.; Sadeghi, H.; Yarranton, H.W.; van den Berg, F.G.A. Regular solution based approach to modeling asphaltene precipitation from native and reacted oils: Part 1, molecular weight, density, and solubility parameter distributions of asphaltenes. *Fuel* **2016**, *178*, 218–233.
8. Yarranton, H.W.; Powers, D.P.; Okafor, J.C.; van den Berg, F.G.A. Regular solution based approach to modeling asphaltene precipitation from native and reacted oils: Part 2, molecular weight, density, and solubility parameter of saturates, aromatics, and resins. *Fuel* **2018**, *215*, 766–777.
9. Goosens, A.G. Prediction of molecular weight of petroleum fractions. *Ind. Eng. Chem. Res.* **1996**, *35*, 985–988.

10. Hosseinifar, P.; Shahverdi, H. A predictive method for constructing the distillation curve of petroleum fluids using their physical bulk properties. *J. Petrol. Sci. Eng.* **2021**, *200*, 108403.
11. Altgelt, K.H.; Boduszynski, M.M. *Composition and Analysis of Heavy Petroleum Fractions*; Marcel Dekker: New York, NY, USA, 1994; pp. 1–495.
12. Soreide, I. Improved Phase Behavior Predictions of Petroleum Reservoir Fluids from a Cubic Equation of State. PhD Thesis, Norwegian Institute of Technology, Department of Petroleum Technology and Applied Geophysics, Trondheim, Norway, 1989.
13. Lee, B.I.; Kesler, M.G. A Generalized thermodynamic correlation based on the three-parameter corresponding states. *AIChE J.* **1975**, *21*, 510–527.
14. Kesler, M.G.; Lee, B.I. Improve prediction of enthalpy of fractions, *Hydrocarb. Process* **1976**, *55*, 153–158.
15. Riazi, M.R.; Daubert, T.E. Simplify property predictions. *Hydrocarb. Process* **1980**, *59*, 115–116.
16. Riazi, M.R.; Daubert, T.E. Analytical correlations interconvert distillation-curve types. *Oil Gas J.* **1986**, *84*, 50–57.
17. Riazi, M.R.; Daubert, T.E. Characterization parameters for petroleum fractions. *Ind. Eng. Chem. Res.* **1987**, *26*, 755–759.
18. Riazi, M.R. *Characterization and Properties of Petroleum Fractions*, 1st ed; ASTM International: West Conshohocken, PA, USA, 2005; pp. 1–407.
19. Rao, V.K.; Bardon, M.F. Estimating the molecular weight of petroleum fractions. *Ind. Eng. Chem. Proc. Des. Dev.* **1985**, *24*, 498.
20. Twu, C.H. An internally consistent correlation for predicting the critical properties and molecular weight of petroleum and coal-tar liquids. *Fluid Phase Equilibria* **1984**, *16*, 137–150.
21. Hariu, O.H.; Sage, R.C. Crude split figured by computer. *Hydrocarb. Process* **1969**, *4*, 143–148.
22. Katz, D.L.; Firoozabadi, B. Predicting phase behavior of condensate/crude oil systems using methane interaction coefficients. *J. Pet. Tech.* **1978**, *228*, 1649–1655.
23. Liñan, L.Z.; Lima, N.M.N.; Maciel, M.R.W.; Filho, R.M.; Medina, L.C.; Embiruçu, M. Correlation for predicting the molecular weight of Brazilian petroleum residues and cuts: An application for the simulation of a molecular distillation process, *J. Pet. Sci. Eng.* **2011**, *78*, 78–85.
24. Liu, Y.A.; Chang, A.-F.; Kiran, P. Chapter 1: Characterization, physical and thermodynamic properties of oil fractions. In *Petroleum Refinery Process Modeling: Integrated Optimization Tools and Applications*; Wiley-VCH Verlag GmbH & Co. KGaA: Weinheim, Germany, 2018; pp. 1–58.
25. Hosseinifar, P.; Shahverdi, H. Prediction of the ASTM and TBP distillation curves and specific gravity distribution curve for fuels and petroleum fluids. *Can. J. Chem. Eng.* **2022**, *100*, 3288–3310. <https://doi.org/10.1002/cjce.24335>.
26. Stratiev, D.; Shishkova, I.; Dinkov, R.; Nenov, S.; Sotirov, S.; Sotirova, E.; Kolev, I.; Ivanov, V.; Ribagin, S.; Atanassov, K.; Stratiev, D.; et al. Prediction of petroleum viscosity from molecular weight and density. *Fuel* **2023**, *331*, 125679. <https://doi.org/10.1016/j.fuel.2022.125679>.
27. Riazi, M.R.; Daubert, T.E. Prediction of molecular-type analysis of petroleum fractions and coal liquids. *Ind. Eng. Chem. Res.* **1986**, *25*, 1009–1015.
28. Riazi, M.R.; Daubert, T.E. Improved characterization of wide boiling range undefined petroleum fractions. *Ind. Eng. Chem. Res.* **1987**, *26*, 629–632.
29. White, C.M.; Perry, M.B.; Schmidt, C.E.; Douglas, L.J. Relationship between refractive indices and other properties of coal hydrogenation distillates. *Energy Fuels* **1987**, *1*, 99–105.
30. Bollas, G.M.; Vasalos, I.A.; Lappas, A.A.; Iatridis, D.K.; Tsioni, G.K. Bulk molecular characterization approach for the simulation of FCC feedstocks, *Ind. Eng. Chem. Res.* **2004**, *43*, 3270–3281.
31. Vargas, F.M.; Chapman, W.G. Application of the one-third rule in hydrocarbon and crude oil systems. *Fluid Phase Equilib.* **2010**, *290*, 103–108.
32. Yarranton, H.W.; Okafor, J.C.; Ortiz, D.P.; van den Berg, F.G.A. Density and refractive index of petroleum, cuts, and mixtures. *Energy Fuels* **2015**, *29*, 5723–5736.
33. Carbognani, L.; Díaz-Gómez, L.; Oldenburg, T.B.P.; Pereira-Almao, P. Determination of molecular masses for petroleum distillates by simulated distillation. *CT F* **2012**, *4*, 43–55.
34. Wang, S.; Dong, X.; Sun, R. Predicting saturates of sour vacuum gas oil using artificial neural networks and genetic algorithms, *Expert Syst. Appl.* **2010**, *37*, 4768–4771.
35. Wang, G.; Liu, Y.; Wang, X.; Xu, C.; Gao, J. Studies on the catalytic cracking performance of coker gas oil. *Energy Fuels* **2009**, *23*, 1942–1949.
36. Pitault, I.; Nevicato, D.; Forissier, M.; Bernard, J.-R. Kinetic model based on a molecular description for catalytic cracking of vacuum gas oil. *Chem. Eng. Sci.* **1994**, *49*, 4249–4262.
37. Sheng, Q.; Wang, G.; Duan, M.; Ren, A.; Yao, L.; Hu, M.; Gao, J. Determination of the hydrogen-donating ability of industrial distillate narrow fractions. *Energy Fuels* **2016**, *30*, 10314–10321.
38. Altgelt, K.H.; Boduszynski, M.M. Composition of heavy petroleum. 3. An improved boiling point-molecular weight relation. *Energy Fuels* **1992**, *6*, 68–72.



39. Dominguez, M. FCC feed fractionation. *Pet. Coal* **2003**, *45*, 113–118.
40. Van Camp, C.E.; Van Damme, P.S.; Froment, G.F. Thermal cracking of kerosene. *Ind. Eng. Chem. Process Des. Dev.* **1984**, *23*, 155–162.
41. Nace, D.M.; Voltz, S.E.; Weekman, Jr, V.W. Application of a kinetic model for catalytic cracking. Effects of charge stocks. *Ind. Eng. Chem. Process Des. Develop.* **1971**, *10*, 530–538.
42. Zhang, Y.; Schuler, B.; Fatayer, S.; Gross, L.; Harper, M.R.; Kushnerick, J.D. Understanding the effects of sample preparation on the chemical structures of petroleum imaged with non-contact atomic force microscopy, *Ind. Eng. Chem. Res.* **2018**, *57*, 15935–15941.
43. Stratiev, D.; Nenov, S.; Nedanovski, D.; Shishkova, I.; Dinkov, R.; Stratiev, D.D.; Stratiev, D.D.; Sotirov, S.; Sotirova, E.; Atanassova, V.; Atanassov, K.; Yordanov, D.; Angelova, N.A.; Ribagin, S.; Todorova-Yankova, L. Different Nonlinear Regression Techniques and Sensitivity Analysis as Tools to Optimize Oil Viscosity Modeling. *Resources* **2021**, *10*, 99. <https://doi.org/10.3390/resources10100099>.
44. Stratiev, D.; Nenov, S.; Sotirov, S.; Shishkova, I.; Palichev, G.; Sotirova, E.; Ivanov, V.; Atanassov, K.; Ribagin, S.; Angelova, N. Petroleum viscosity modeling using least squares and ANN methods. *J. Pet. Sci. Eng.* **2022**, *212*, 110306. <https://doi.org/10.1016/j.petrol.2022.110306>.
45. Sinha, U.; Dindoruk, B.; Soliman, M. Machine learning augmented dead oil viscosity model for all oil types. *J. Pet. Sci. Eng.* **2020**, *195*, 107603. <https://doi.org/10.1016/j.petrol.2020.107603>.
46. Sinha, U.; Dindoruk, B.; Soliman, M.Y. Physics augmented correlations and machine learning methods to accurately calculate dead oil viscosity based on the available inputs. *SPE J.* **2022**, *27*, 3240–3253. <https://doi.org/10.2118/209610-PA>.
47. Stratiev, D.; Marinov, I.; Dinkov, R.; Shishkova, I.; Velkov, I.; Sharafutdinov, I.; Nenov, S.; Tsvetkov, T.; Sotirov, S.; Mitkova, M.; et al. Opportunity to improve diesel fuel cetane number prediction from easy available physical properties and application of the least squares method and the artificial neural networks. *Energy Fuels* **2015**, *29*, 1520–1533.
48. Shishkova, I.; Stratiev, D.; Kolev, I.V.; Nenov, S.; Nedanovski, D.; Atanassov, K.; Ivanov, V.; Ribagin, S. Challenges in Petroleum Characterization—A Review. *Energies* **2022**, *15*, 7765.
49. D'Addona, D.M. Neural Network. In *CIRP Encyclopedia of Production Engineering*; Laperrière, L., Reinhart, G. Eds.; Springer: Berlin/Heidelberg, Germany, 2014. [https://doi.org/10.1007/978-3-642-20617-7\\_6563](https://doi.org/10.1007/978-3-642-20617-7_6563).
50. Yang, Z.R.; Yang, Z. 6.01—Artificial Neural Networks. *Compr. Biomed. Phys.* **2014**, *6*, 1–17. <https://doi.org/10.1016/B978-0-444-53632-7.01101-1>.
51. Hadavimoghaddam, F.; Ostadhassan, M.; Heidaryan, E.; Sadri, M.A.; Chapanova, I.; Popov, E.; Cheremisin, A.; Rafieepour, S. Prediction of dead oil viscosity: Machine learning vs. classical correlations. *Energies* **2021**, *14*, 930. <https://doi.org/10.3390/en14040930>.
